# Supplementary material for: Synthesis of Dense and Chiral Dendritic Polyols Using Glyconanosynthon Scaffolds
Source: PubMed Central journal article supplement (PMC6274151; doi:10.3390/molecules21040448), 2016-04-04
Supplement: molecules-21-00448-s001.pdf [file molecules-21-00448-s001.pdf]

# Supplementary Information: Synthesis of Dense and Chiral Dendritic Polyols Using Glyconanosphon Scaffolds

Tze Chieh Shiao, Rabindra Rej, Mariecka Rose, Giovanni M. Pavan and René Roy

## 1. Characterizations ( $^1\text{H}$ , $^{13}\text{C}$ and COSY NMR; HRMS and GPC)

### 1.1. Propargyl 2,3,4,6-tetra-*O*-propargyl- $\beta$ -D-glucopyranoside (5)

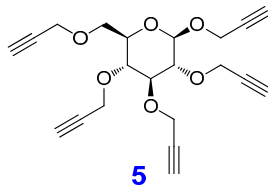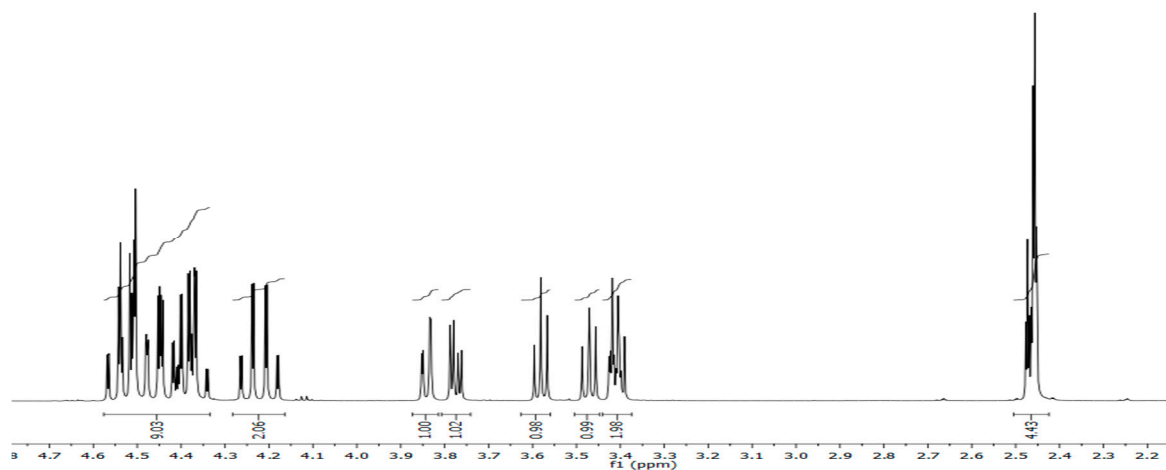

**Figure S1.**  $^1\text{H}$ -NMR spectrum of Propargyl 2,3,4,6-tetra-*O*-propargyl- $\beta$ -D-glucopyranoside (5).

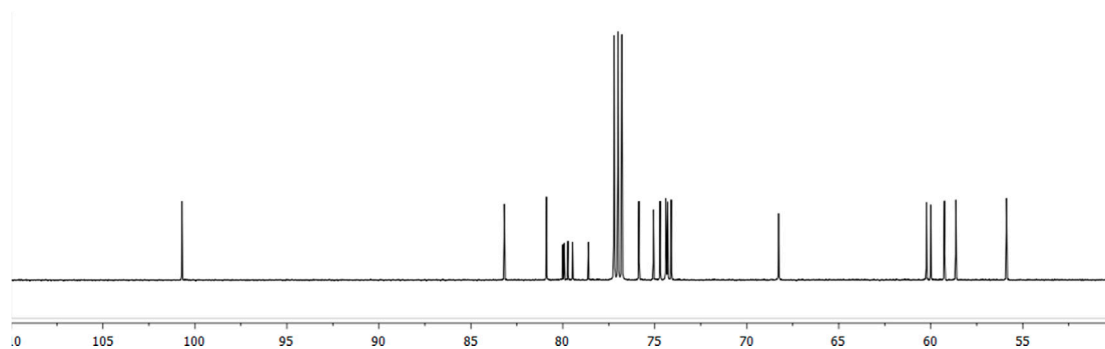

**Figure S2.**  $^{13}\text{C}$ -NMR spectrum of Propargyl 2,3,4,6-tetra-*O*-propargyl- $\beta$ -D-glucopyranoside (5).

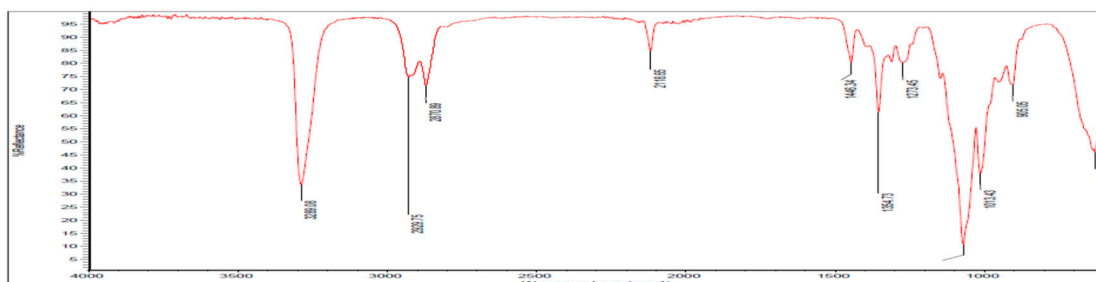

**Figure S3.** IR spectrum of Propargyl 2,3,4,6-tetra-*O*-propargyl- $\beta$ -D-glucopyranoside (**5**).

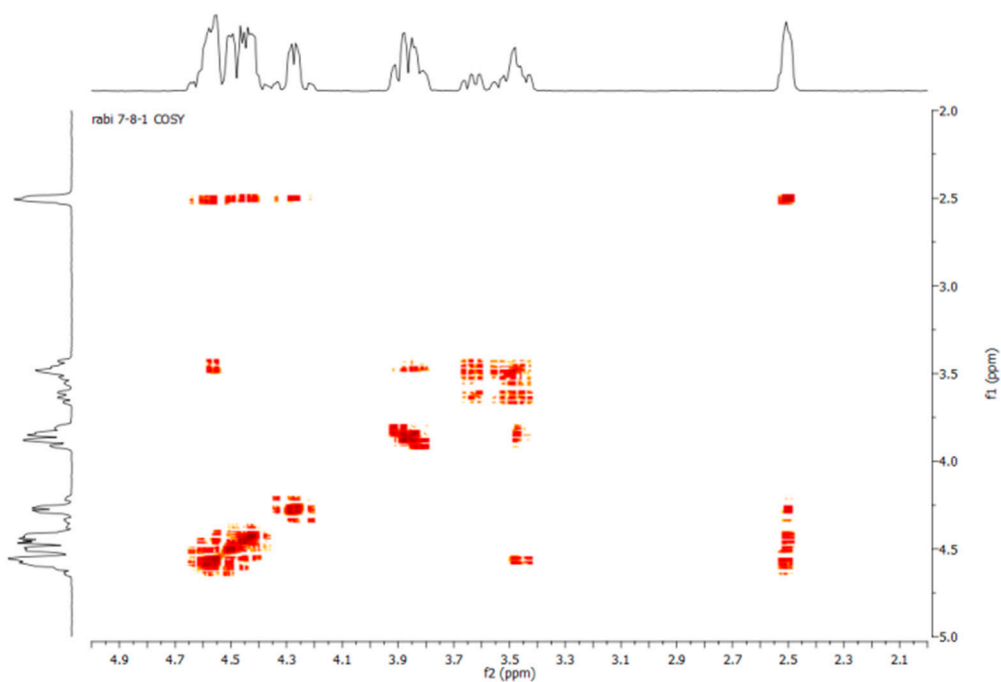

**Figure S4.**  $^1\text{H}$ - $^1\text{H}$  COSY-NMR of **5**.

### 1.2. 2-Azidoethyl 2,3,4,6-tetra-*O*-propargyl- $\beta$ -D-glucopyranoside (**8**)

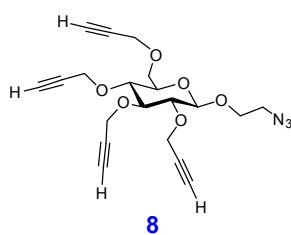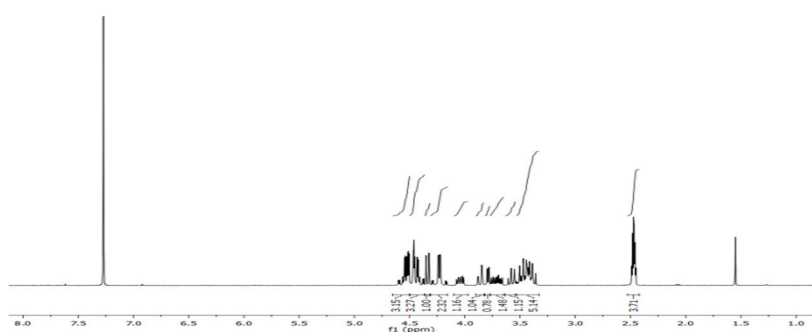

**Figure S5.**  $^1\text{H}$ -NMR spectrum of 2-azidoethyl 2,3,4,6-tetra-*O*-propargyl- $\beta$ -D-glucopyranoside (**8**).

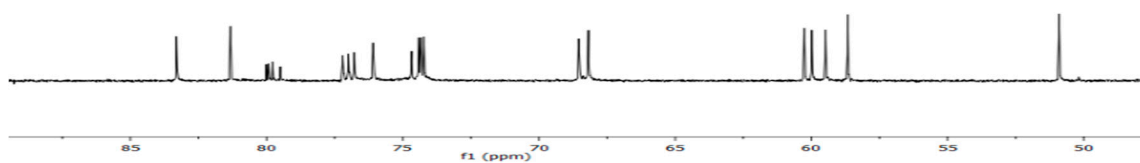

Figure S6.  $^{13}\text{C}$ -NMR spectrum of 2-azidoethyl 2,3,4,6-tetra-*O*-propargyl- $\beta$ -D-glucopyranoside (8).

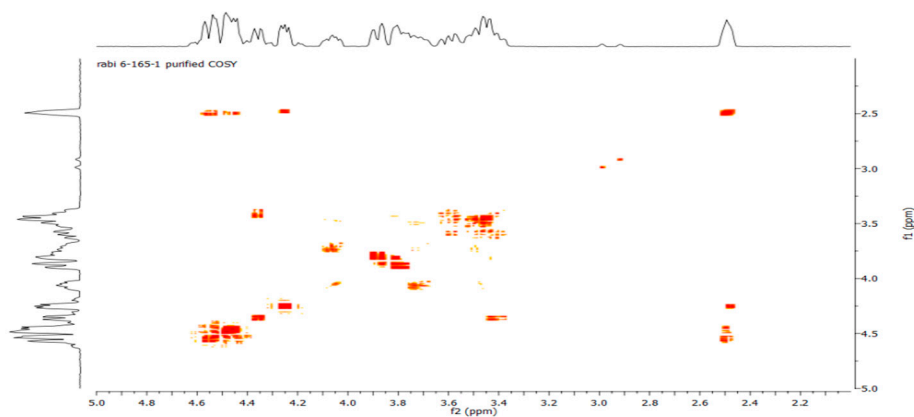

Figure S7.  $^1\text{H}$ - $^1\text{H}$  COSY-NMR of 2-azidoethyl 2,3,4,6-tetra-*O*-propargyl- $\beta$ -D-glucopyranoside (8).

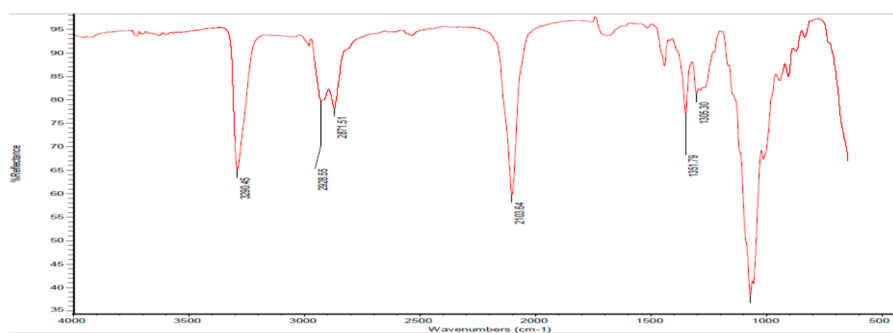

Figure S8. IR spectrum of 8.

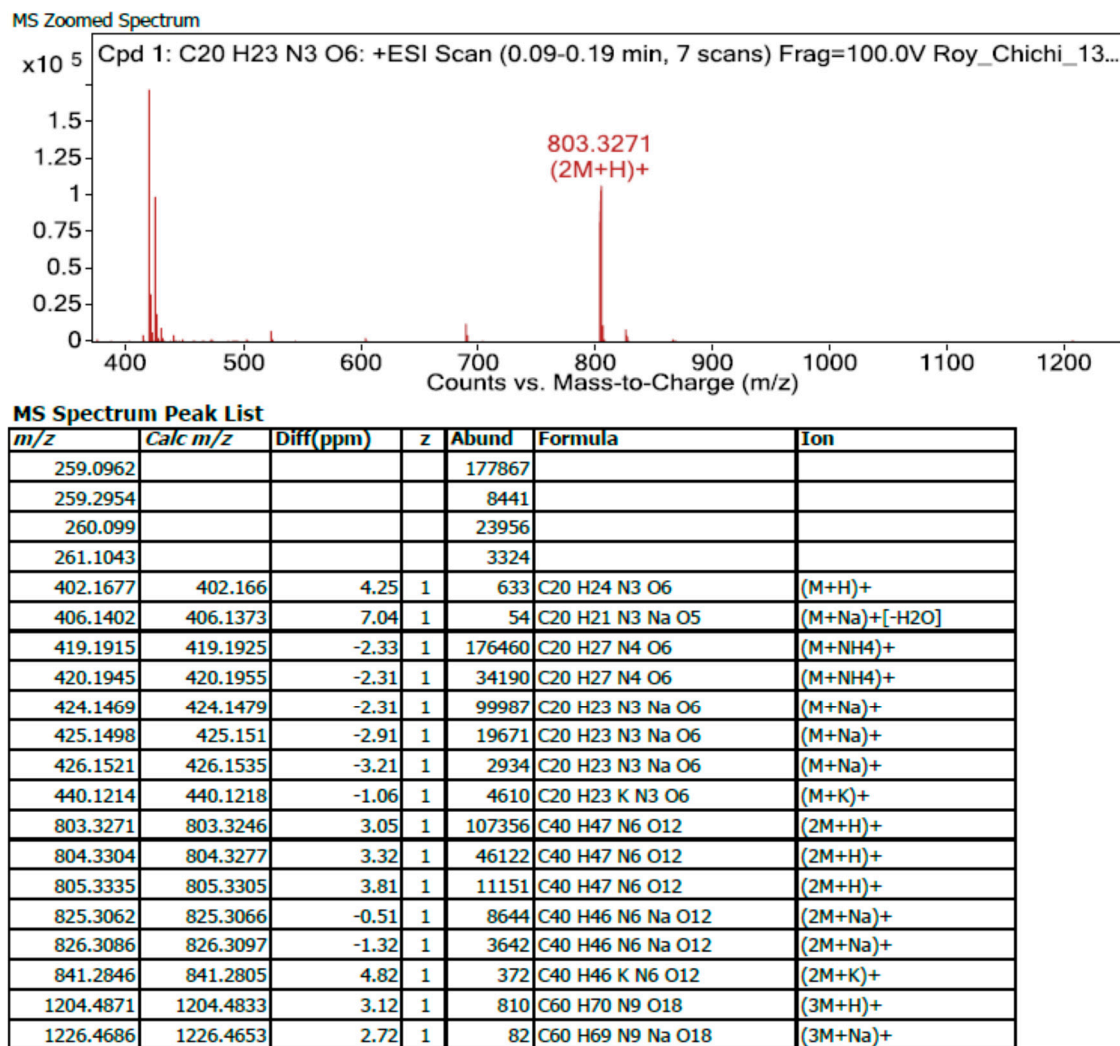

Figure S9. High resolution mass spectrum of 8.

1.3. 2-Azidoethyl 2,3,4,6-tetra-O-trimethylsilylpropargyl- $\beta$ -D-glucopyranoside (9)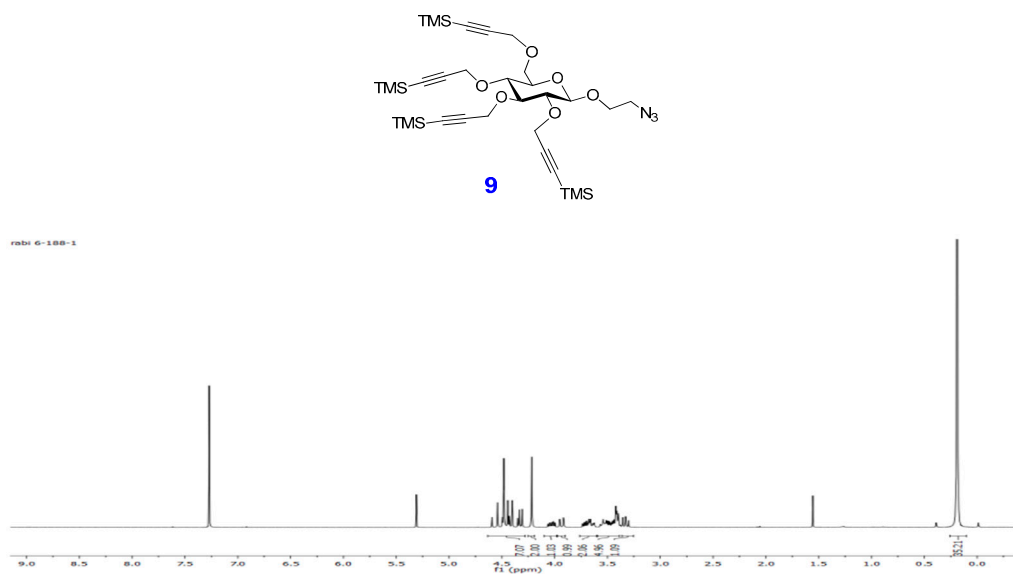Figure S10. <sup>1</sup>H-NMR spectrum of 9.

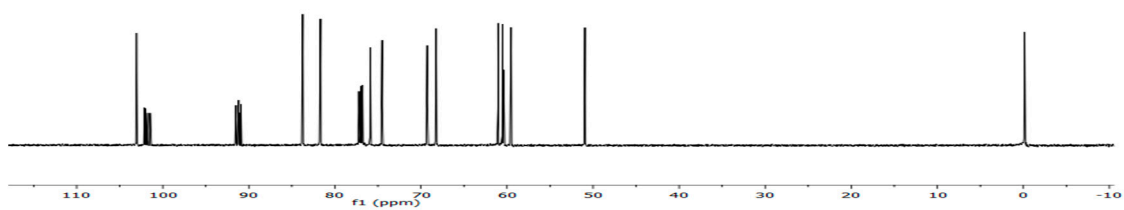Figure S11.  $^{13}\text{C}$ -NMR spectrum of 9.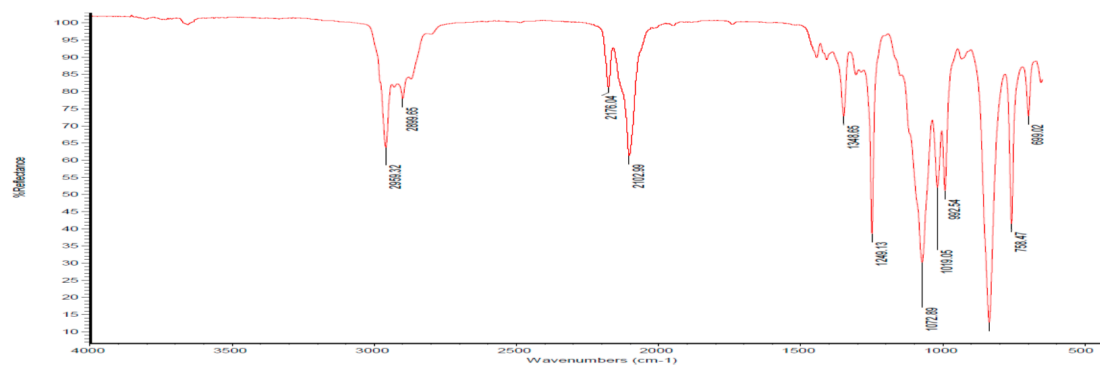

Figure S12. IR spectrum of 9.

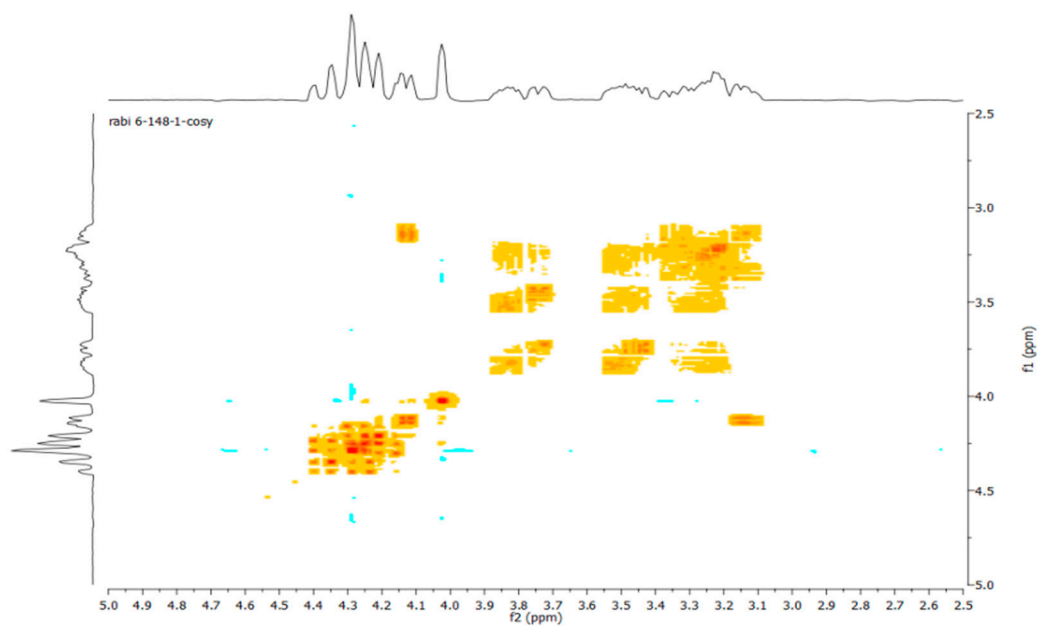Figure S13.  $^1\text{H}$ - $^1\text{H}$  COSY-NMR of 9.

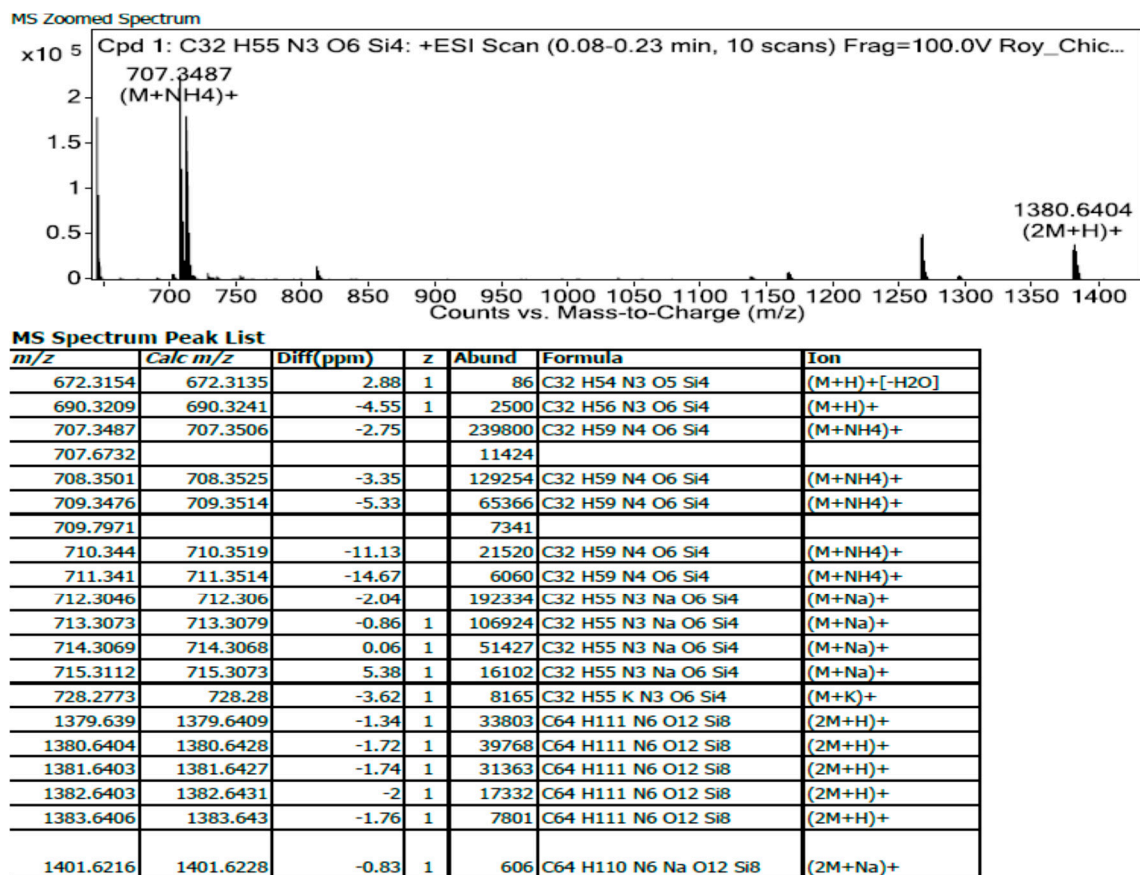

Figure S14. High resolution mass spectrum of 9.

## 1.4. Dendrimer 10

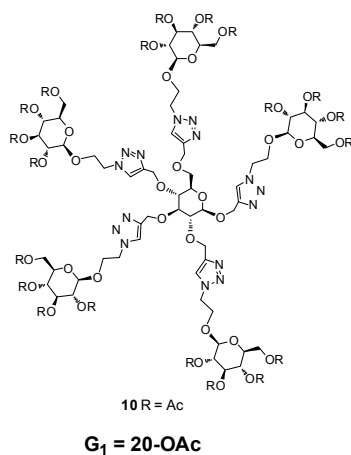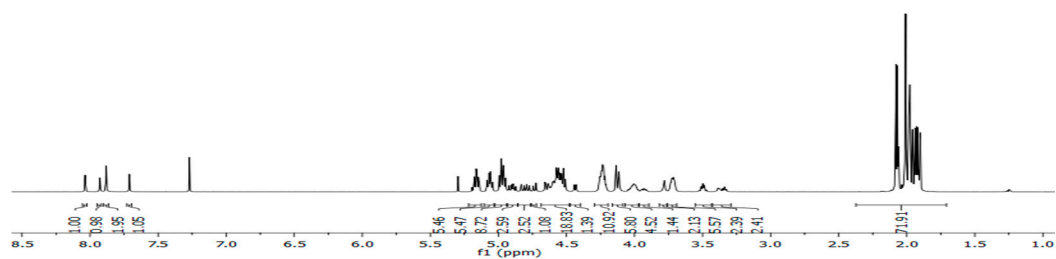Figure S15. <sup>1</sup>H-NMR spectrum of 10.

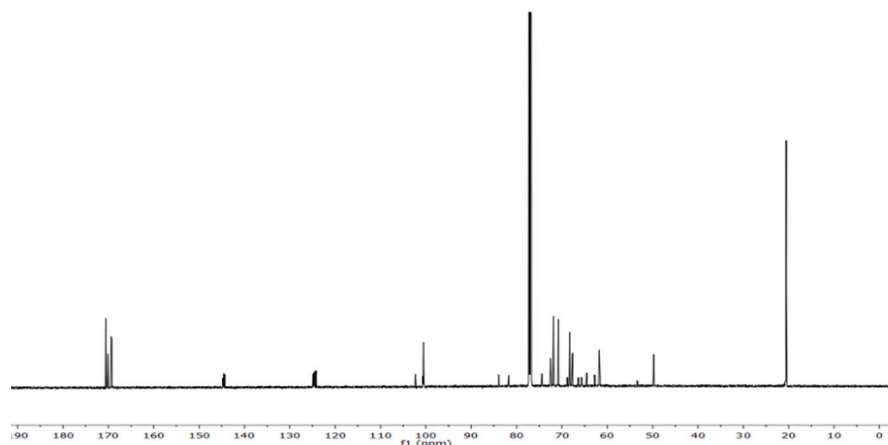Figure S16.  $^{13}\text{C}$ -NMR spectrum of 10.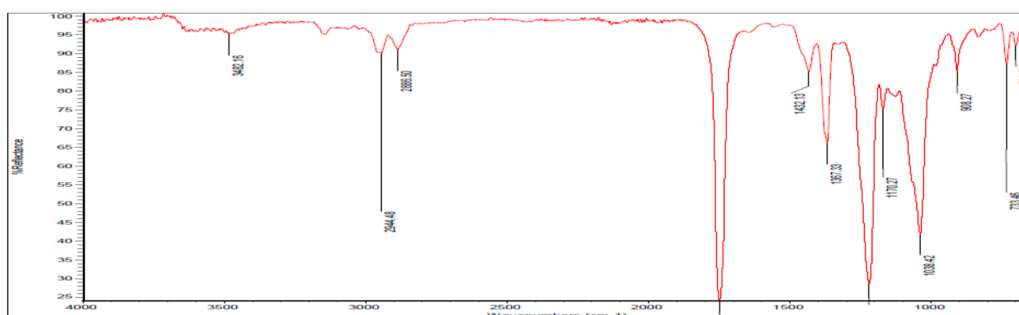

Figure S17. IR spectrum of 10.

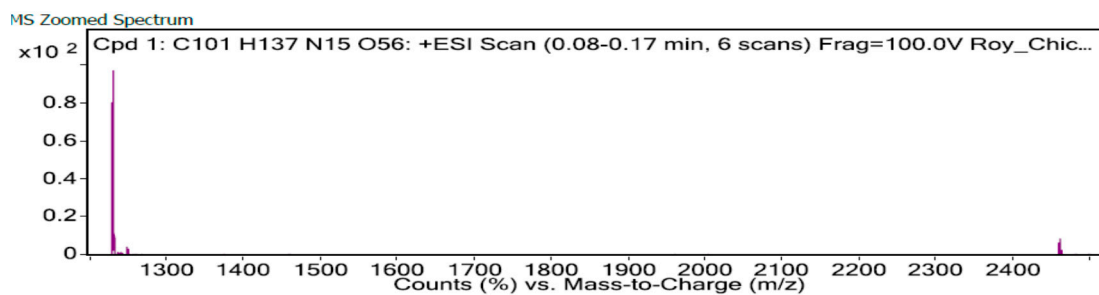

## MS Spectrum Peak List

| $m/z$     | Calc $m/z$ | Diff(ppm) | z | Abund  | Formula              | Ion          |
|-----------|------------|-----------|---|--------|----------------------|--------------|
| 1228.9257 | 1228.924   | 1.44      |   | 304717 | C101 H139 N15 O56    | (M+2H)+2     |
| 1229.4246 | 1229.4255  | -0.77     |   | 376627 | C101 H139 N15 O56    | (M+2H)+2     |
| 1229.9236 | 1229.9269  | -2.74     |   | 264344 | C101 H139 N15 O56    | (M+2H)+2     |
| 1230.4226 | 1230.4283  | -4.67     |   | 134676 | C101 H139 N15 O56    | (M+2H)+2     |
| 1230.9226 | 1230.9296  | -5.73     |   | 55458  | C101 H139 N15 O56    | (M+2H)+2     |
| 1231.4221 | 1231.4309  | -7.17     |   | 21270  | C101 H139 N15 O56    | (M+2H)+2     |
| 1231.9156 | 1231.9322  | -13.46    |   | 9019   | C101 H139 N15 O56    | (M+2H)+2     |
| 1232.4072 | 1232.4335  | -21.29    |   | 4364   | C101 H139 N15 O56    | (M+2H)+2     |
| 1232.6882 |            |           |   | 2781   |                      |              |
| 1232.896  |            |           |   | 2621   |                      |              |
| 2456.8347 | 2456.8406  | -2.43     | 1 | 25699  | C101 H138 N15 O56    | (M+H)+       |
| 2457.8385 | 2457.8438  | -2.13     | 1 | 32233  | C101 H138 N15 O56    | (M+H)+       |
| 2458.8391 | 2458.8466  | -3.06     | 1 | 21581  | C101 H138 N15 O56    | (M+H)+       |
| 2459.8425 | 2459.8493  | -2.75     | 1 | 9956   | C101 H138 N15 O56    | (M+H)+       |
| 2460.8482 | 2460.852   | -1.52     | 1 | 3769   | C101 H138 N15 O56    | (M+H)+       |
| 2477.7929 | 2477.7891  | 1.56      | 1 | 492    | C101 H135 K N15 O55  | (M+K)+[-H2O] |
| 2478.8307 | 2478.8226  | 3.29      | 1 | 2104   | C101 H137 N15 Na O56 | (M+Na)+      |
| 2479.834  | 2479.8257  | 3.37      | 1 | 2213   | C101 H137 N15 Na O56 | (M+Na)+      |
| 2494.7985 | 2494.7965  | 0.8       | 1 | 2379   | C101 H137 K N15 O56  | (M+K)+       |
| 2495.798  | 2495.7996  | -0.67     | 1 | 2833   | C101 H137 K N15 O56  | (M+K)+       |

Figure S18. High resolution mass spectrum of (10).

## 1.5. Dendrimer 11

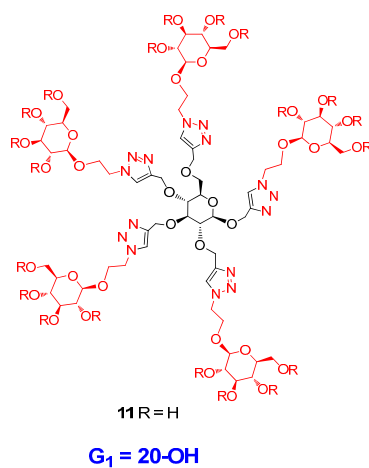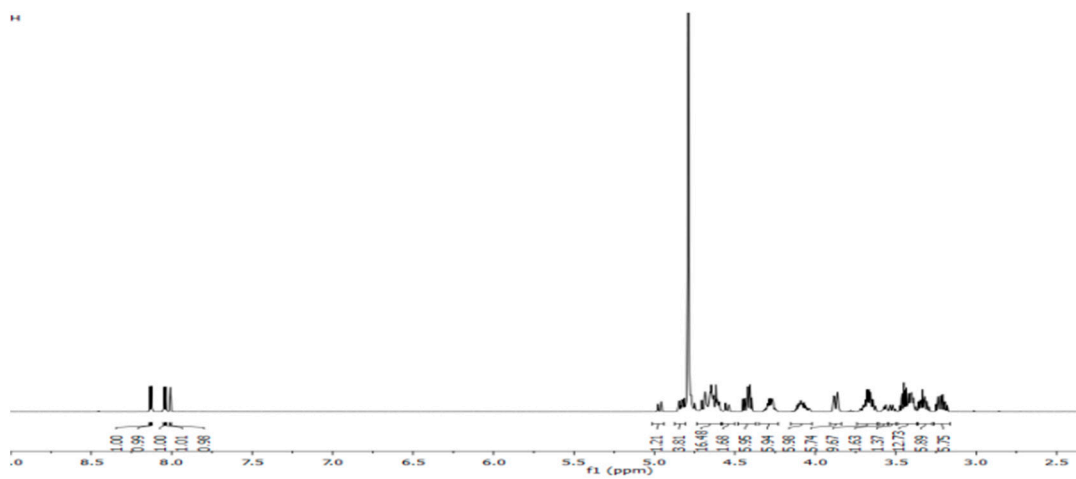Figure S19.  $^1H$ -NMR spectrum of 11.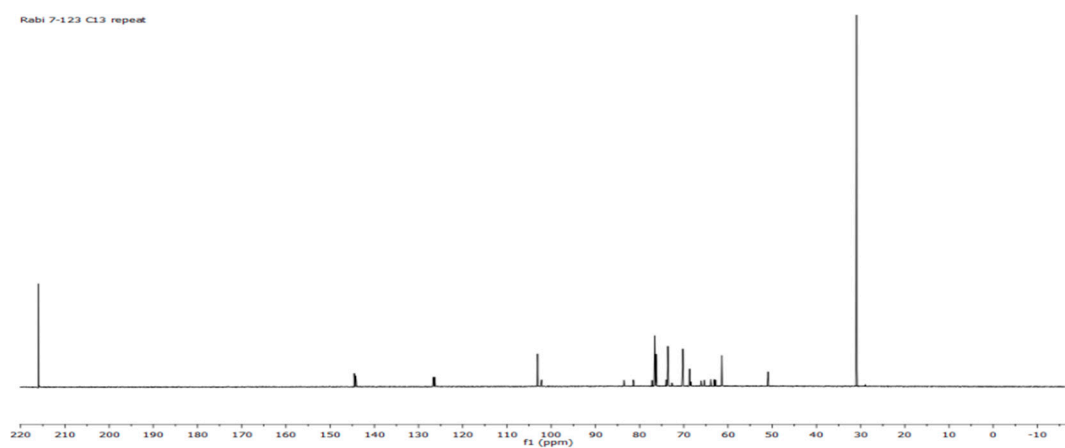Figure S20.  $^{13}C$ -NMR spectrum of 11.



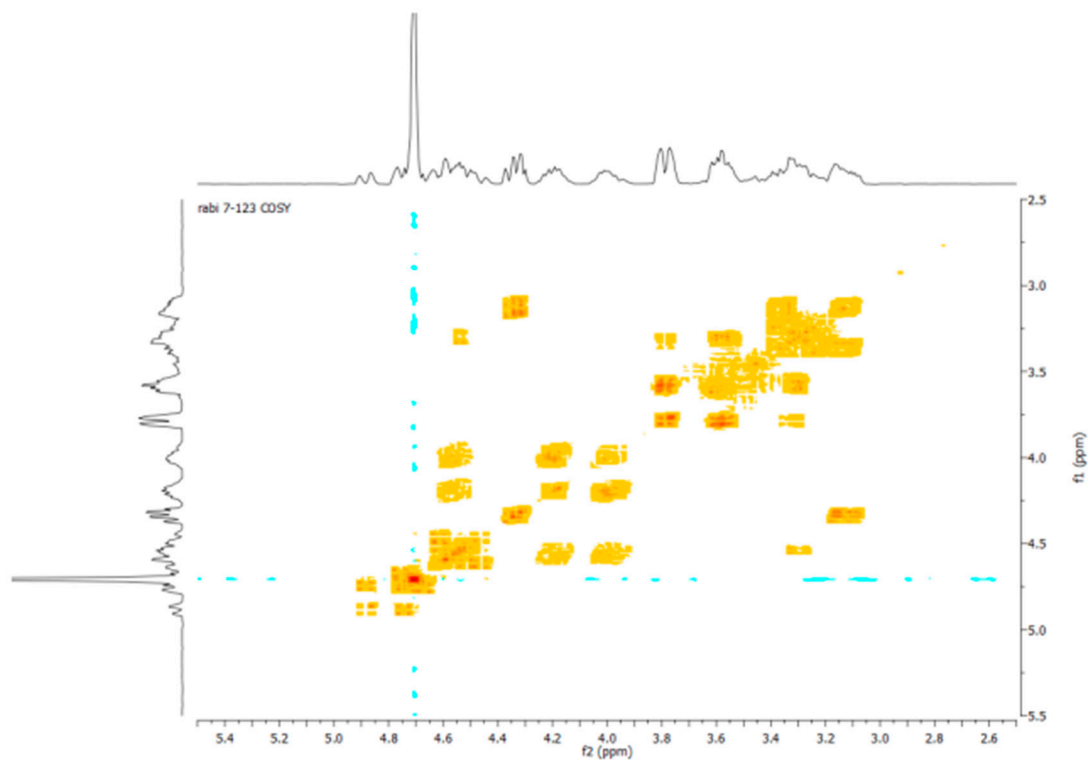Figure S21.  $^1\text{H}$ - $^1\text{H}$  COSY-NMR of 11.

## MS Zoomed Spectrum

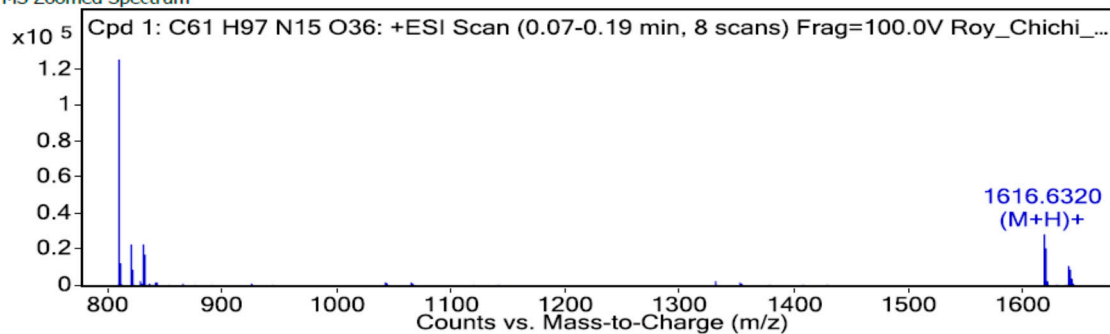

## MS Spectrum Peak List

| $m/z$     | Calc $m/z$ | Diff(ppm) | $z$ | Abund  | Formula                                                                         | Ion                   |
|-----------|------------|-----------|-----|--------|---------------------------------------------------------------------------------|-----------------------|
| 808.8206  | 808.8183   | 2.85      | 1   | 126172 | C <sub>61</sub> H <sub>99</sub> N <sub>15</sub> O <sub>36</sub>                 | (M+2H) <sup>2+</sup>  |
| 809.3219  | 809.3198   | 2.67      | 1   | 90605  | C <sub>61</sub> H <sub>99</sub> N <sub>15</sub> O <sub>36</sub>                 | (M+2H) <sup>2+</sup>  |
| 809.8235  | 809.8211   | 3.05      | 1   | 40449  | C <sub>61</sub> H <sub>99</sub> N <sub>15</sub> O <sub>36</sub>                 | (M+2H) <sup>2+</sup>  |
| 810.3248  | 810.3223   | 3.08      | 1   | 13374  | C <sub>61</sub> H <sub>99</sub> N <sub>15</sub> O <sub>36</sub>                 | (M+2H) <sup>2+</sup>  |
| 830.8022  | 830.8003   | 2.32      | 2   | 23375  | C <sub>61</sub> H <sub>97</sub> N <sub>15</sub> Na <sub>2</sub> O <sub>36</sub> | (M+2Na) <sup>2+</sup> |
| 831.3041  | 831.3017   | 2.84      | 2   | 17444  | C <sub>61</sub> H <sub>97</sub> N <sub>15</sub> Na <sub>2</sub> O <sub>36</sub> | (M+2Na) <sup>2+</sup> |
| 1616.632  | 1616.6293  | 1.67      | 1   | 29076  | C <sub>61</sub> H <sub>98</sub> N <sub>15</sub> O <sub>36</sub>                 | (M+H) <sup>+</sup>    |
| 1617.6345 | 1617.6323  | 1.34      | 1   | 20960  | C <sub>61</sub> H <sub>98</sub> N <sub>15</sub> O <sub>36</sub>                 | (M+H) <sup>+</sup>    |
| 1638.6062 | 1638.6113  | -3.11     | 1   | 11885  | C <sub>61</sub> H <sub>97</sub> N <sub>15</sub> Na O <sub>36</sub>              | (M+Na) <sup>+</sup>   |
| 1654.5751 | 1654.5852  | -6.1      | 1   | 202    | C <sub>61</sub> H <sub>97</sub> K N <sub>15</sub> O <sub>36</sub>               | (M+K) <sup>+</sup>    |

Figure S22. High resolution mass spectrum of 11.

## 1.6. Dendrimer 12

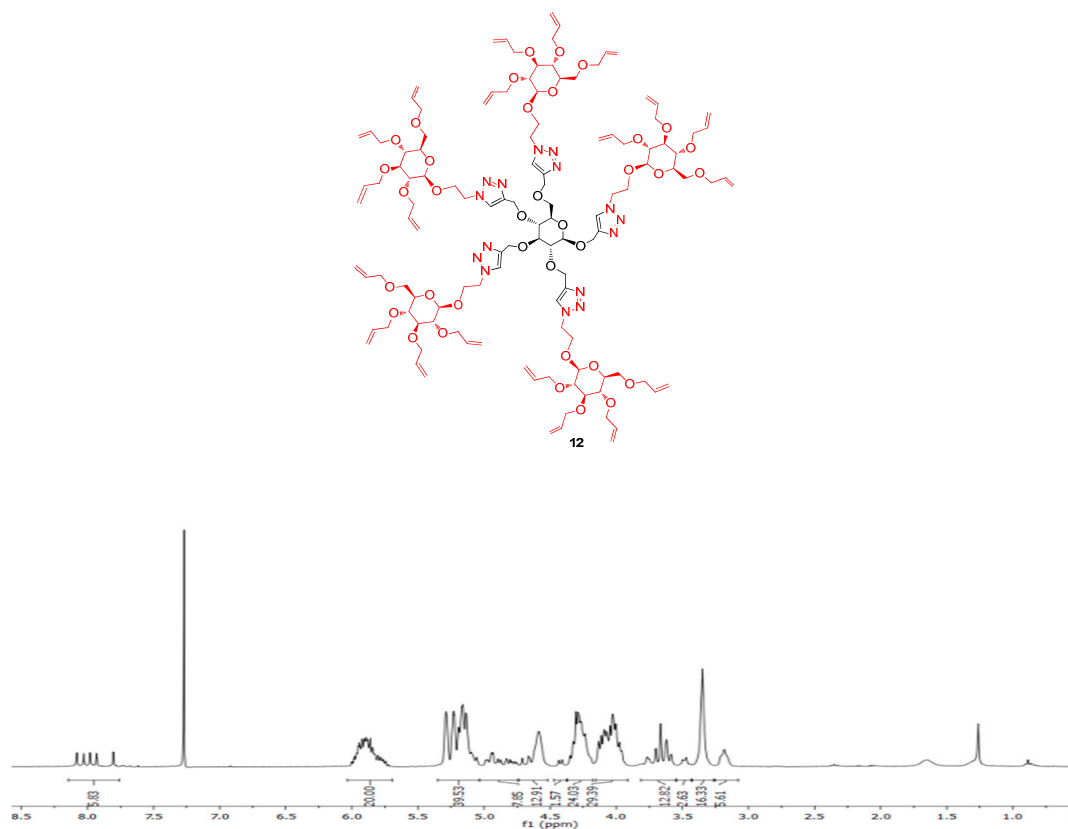Figure S23. <sup>1</sup>H-NMR spectrum of 12 obtained by direct allylation.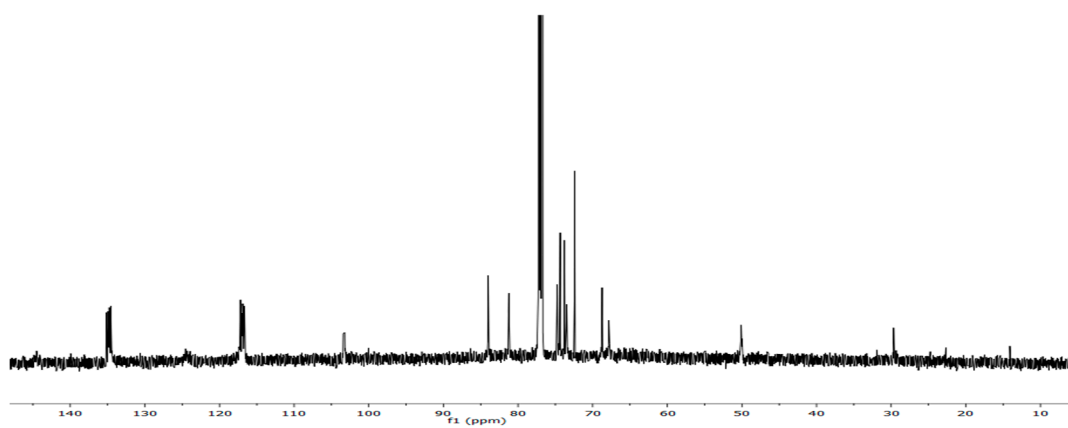Figure S24. <sup>13</sup>C-NMR spectrum of 12.

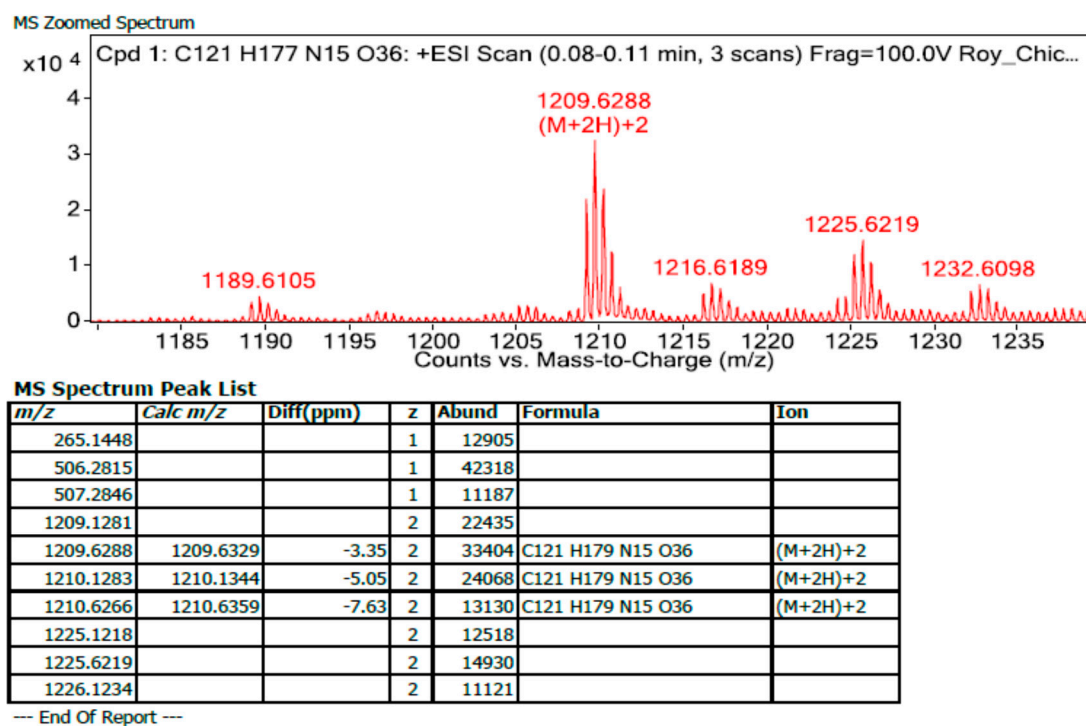

Figure S25. High resolution mass spectrum of 12.

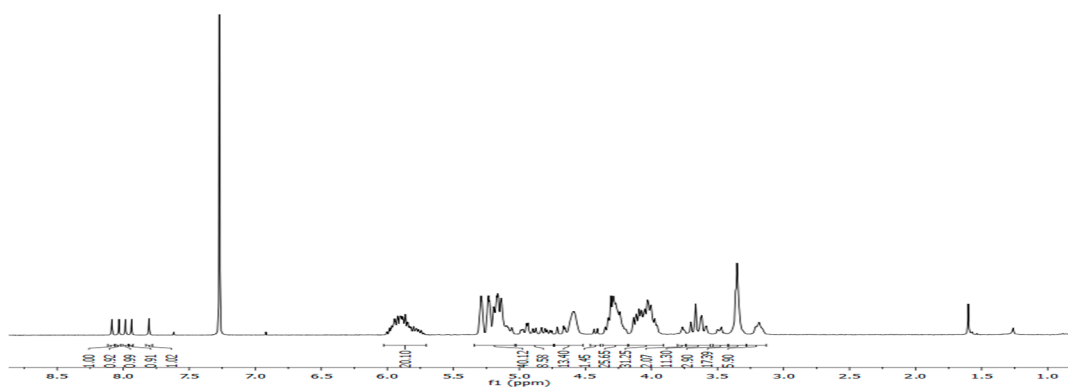Figure S26. <sup>1</sup>H-NMR spectrum of 12 obtained from Click reaction.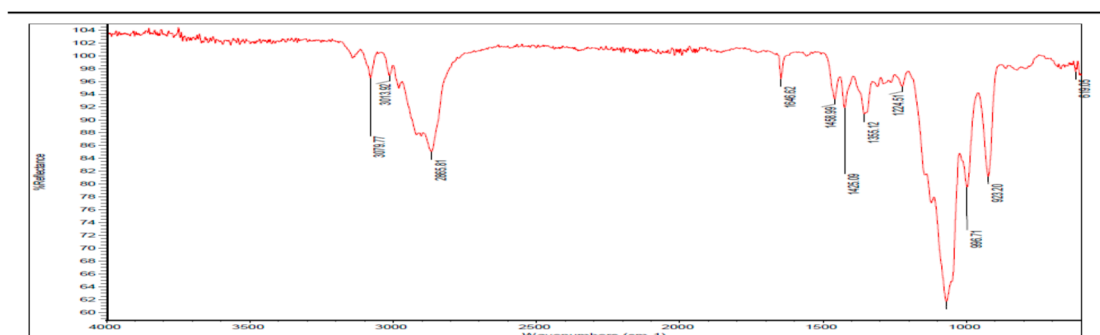

Figure S27. IR spectrum of 12 obtained from Click reaction.

## 1.7. Dendrimer 13

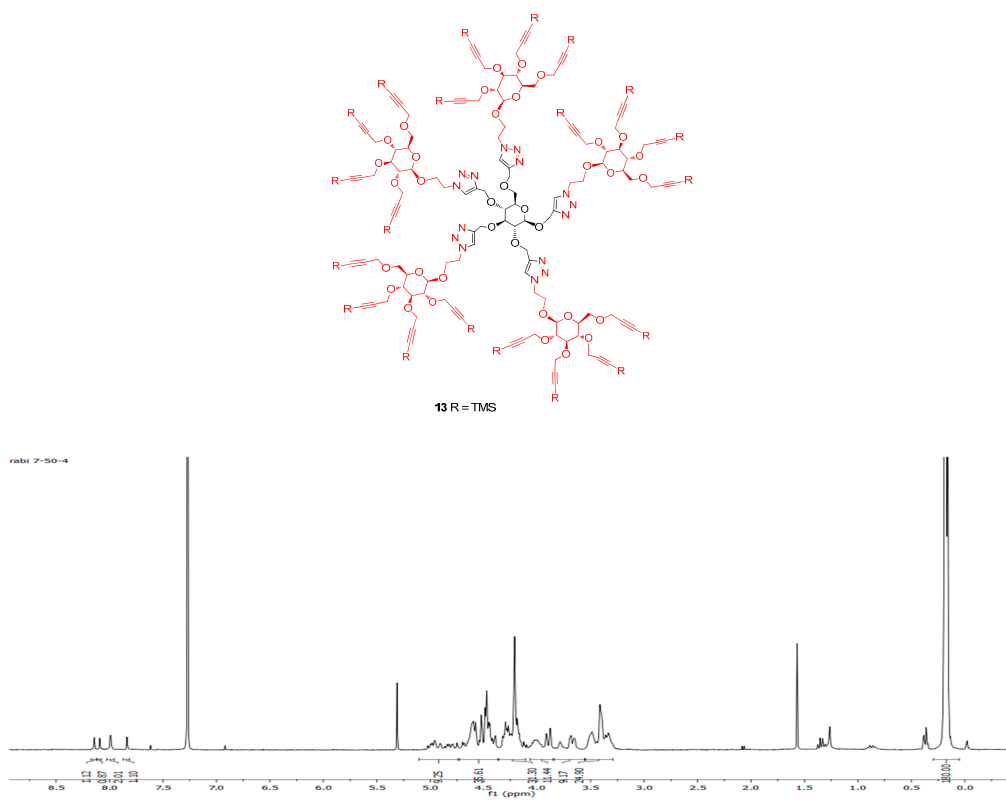Figure S28. <sup>1</sup>H-NMR(CDCl<sub>3</sub>) of 13.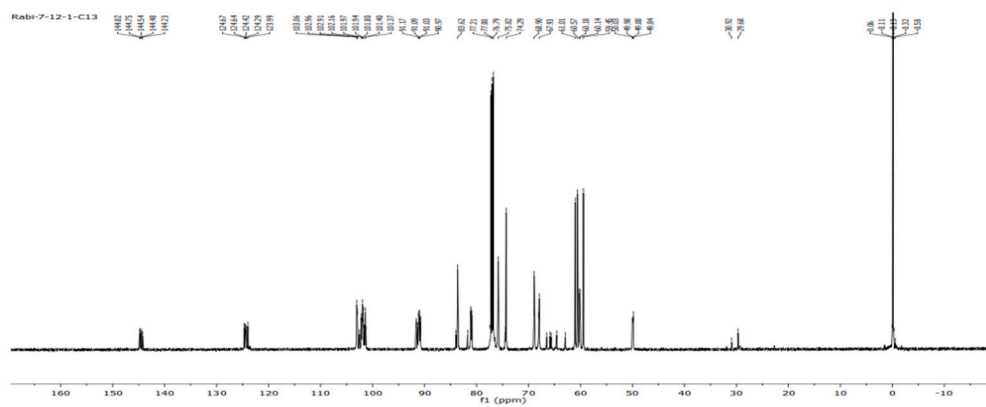Figure S29. <sup>13</sup>C-NMR spectrum of 13.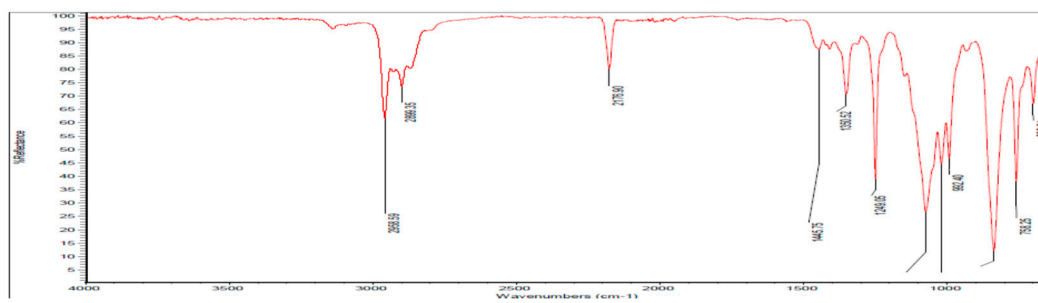

Figure S30. IR spectrum of 13.

## 1.8. Dendrimer 14

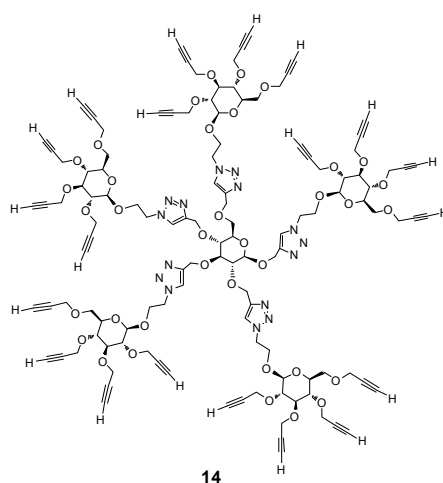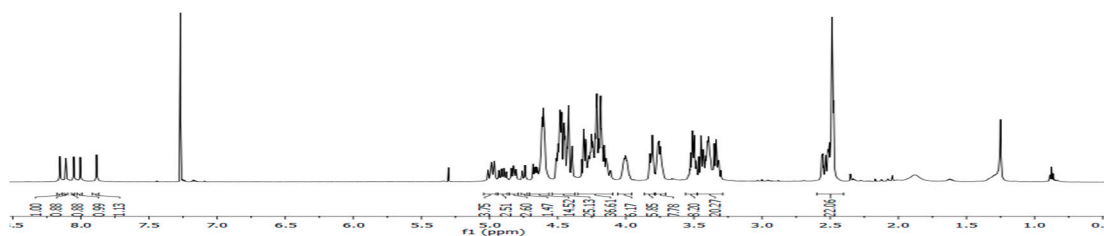Figure S31. <sup>1</sup>H-NMR (CDCl<sub>3</sub>) spectrum of 14.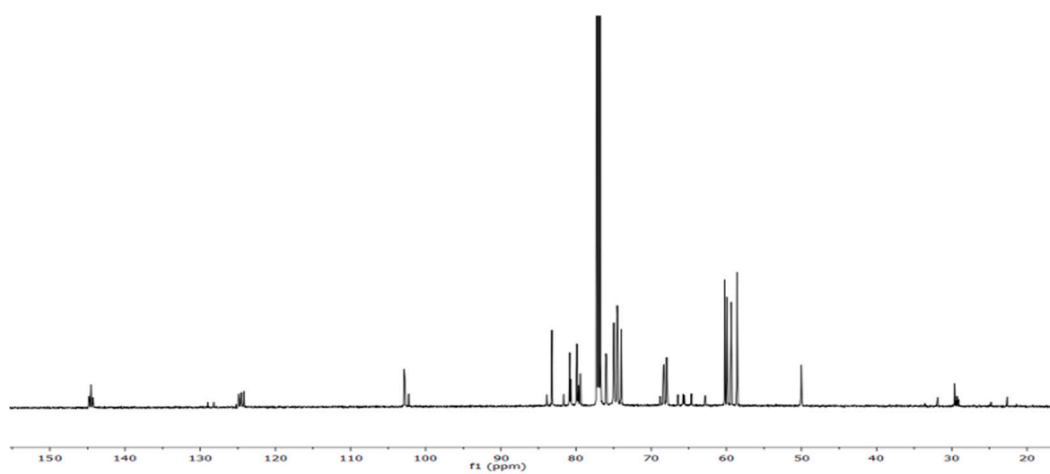Figure S32. <sup>13</sup>C-NMR spectrum of 14.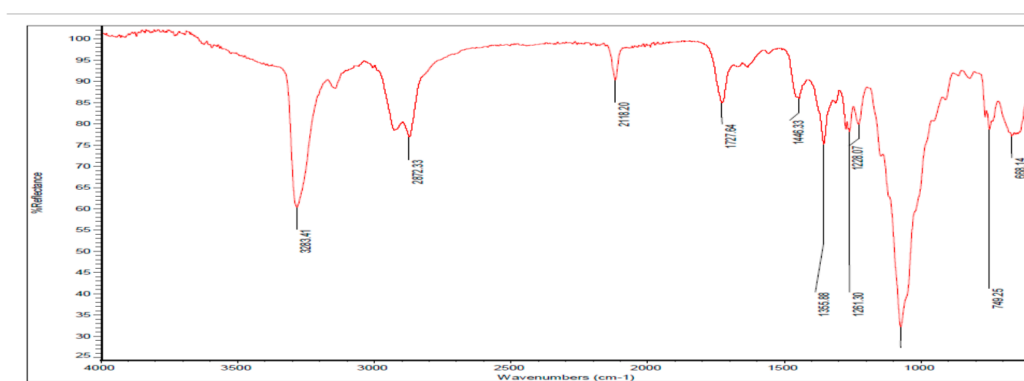

Figure S33. IR spectrum of 14.

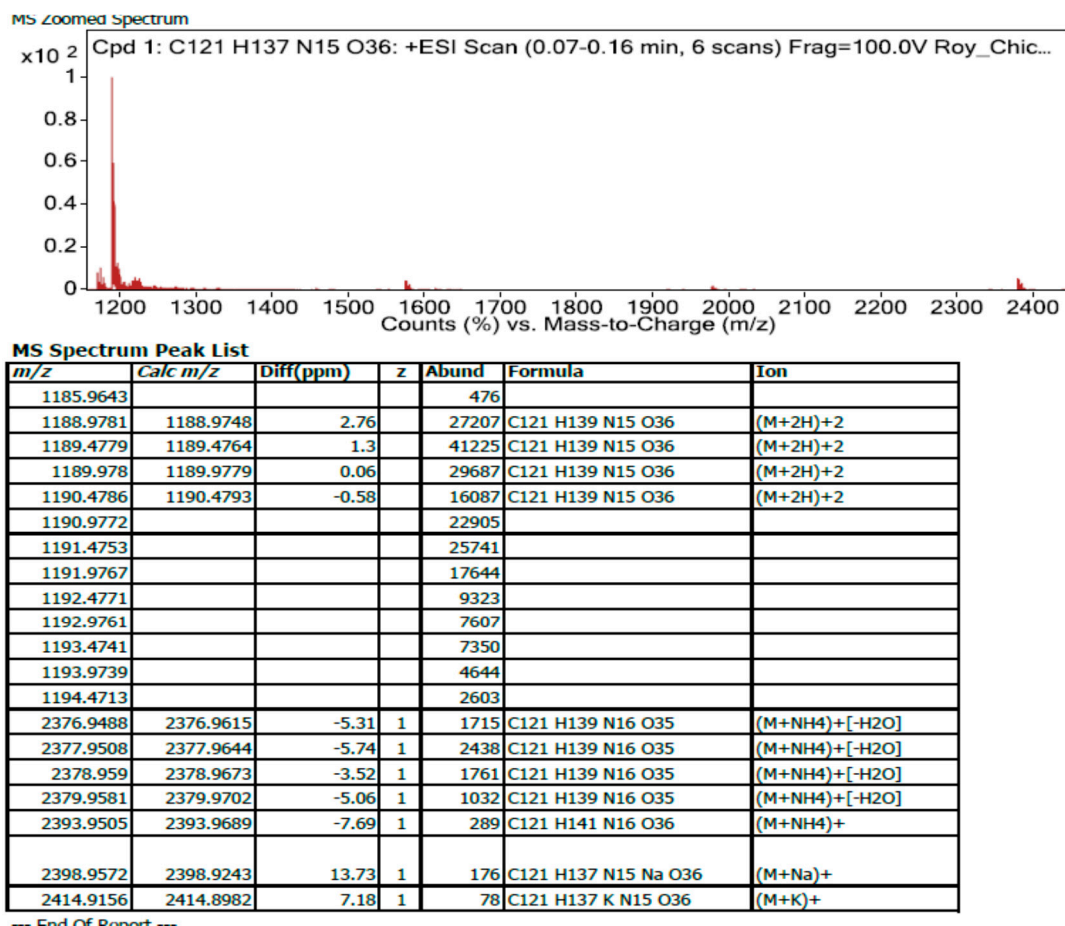

Figure S34. High resolution mass spectrum of 14.

## 1.9. Dendrimer 15

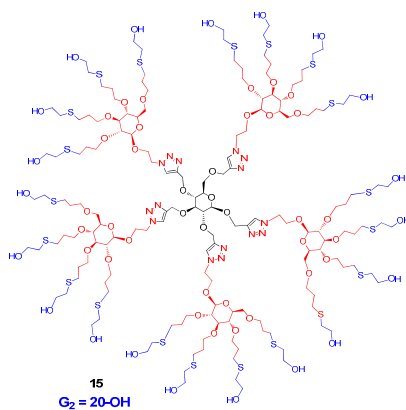

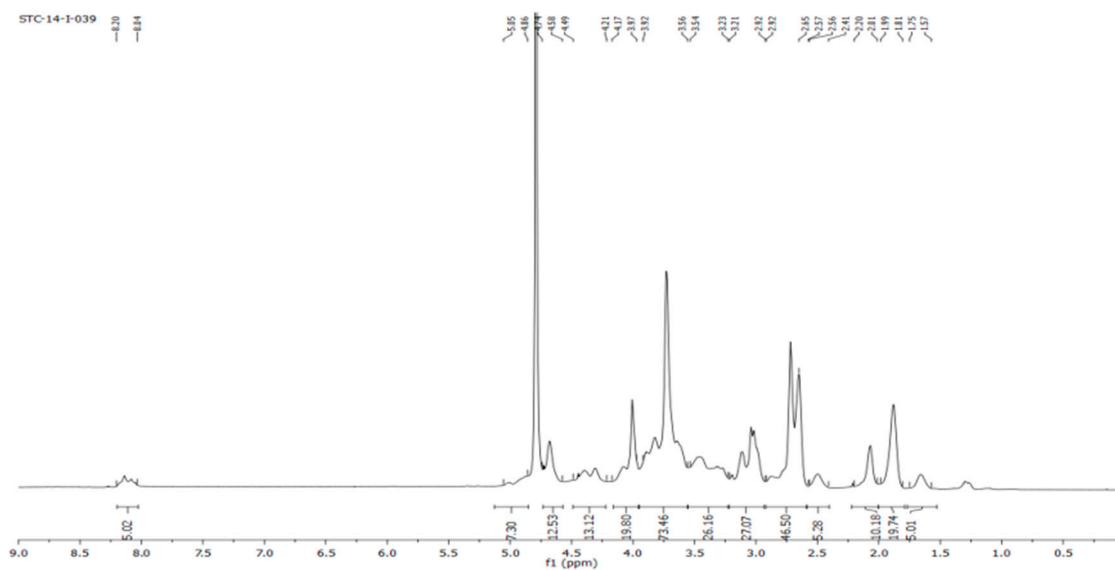

Figure S35.  $^1\text{H-NMR}$  ( $\text{D}_2\text{O}$ ) spectrum of 15.

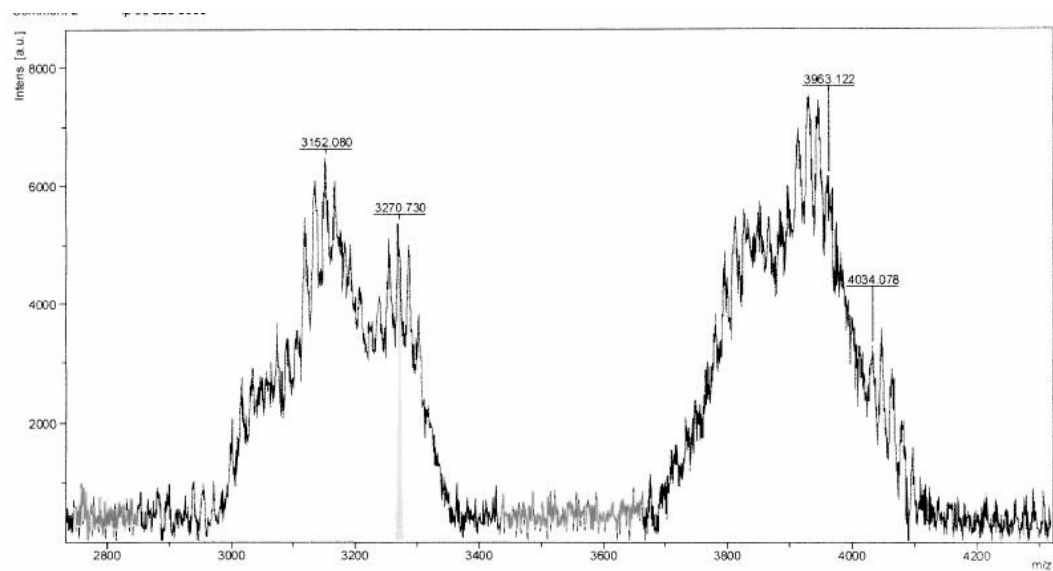

Figure S36. Maldi-tof of compound 15.

## 1.10. Dendrimer 16

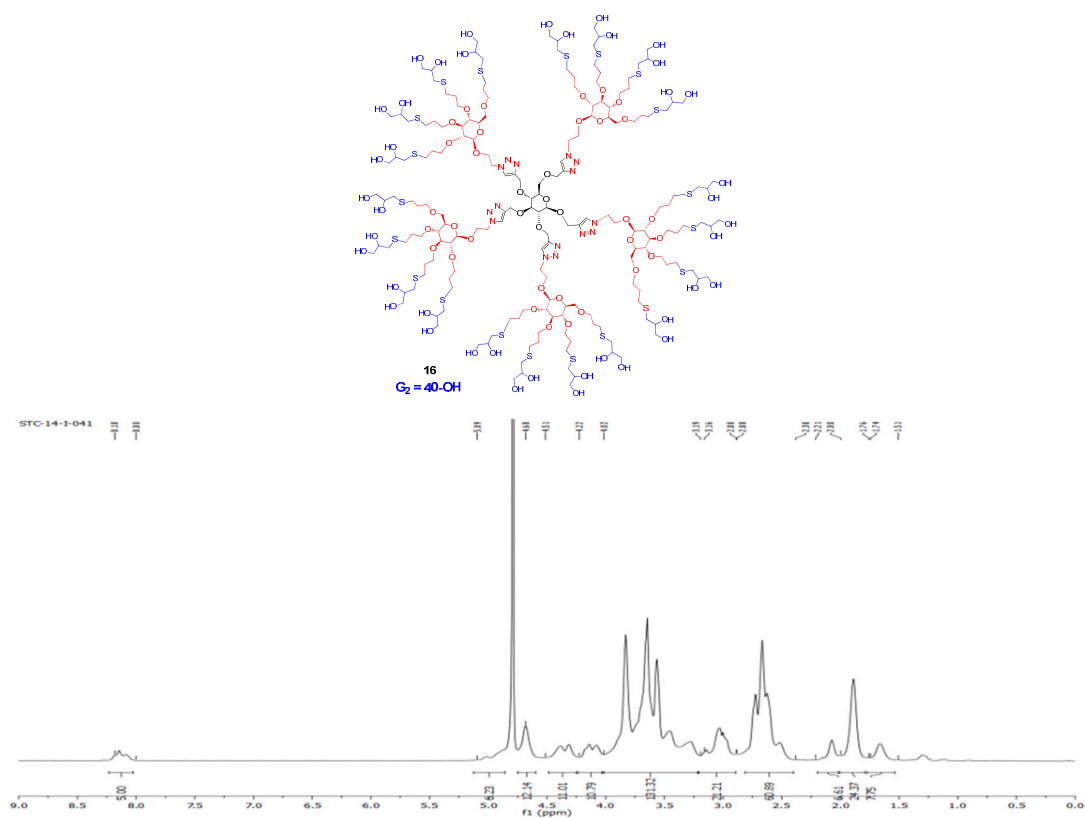Figure S37. <sup>1</sup>H-NMR (D<sub>2</sub>O) spectrum of 16.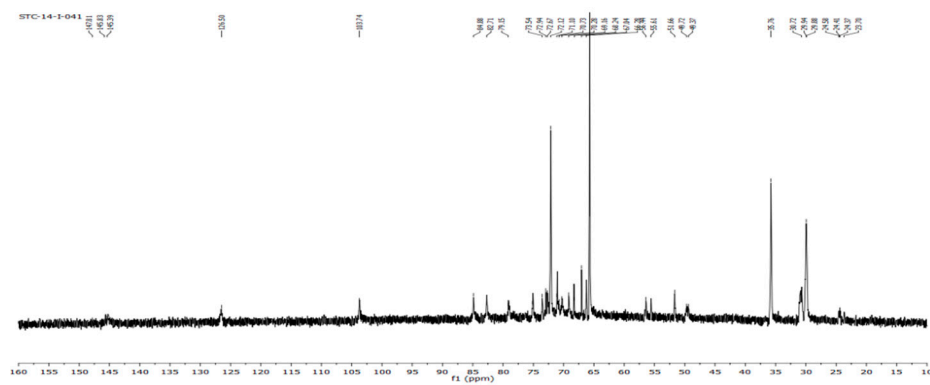Figure S38. <sup>13</sup>C-NMR of 16.



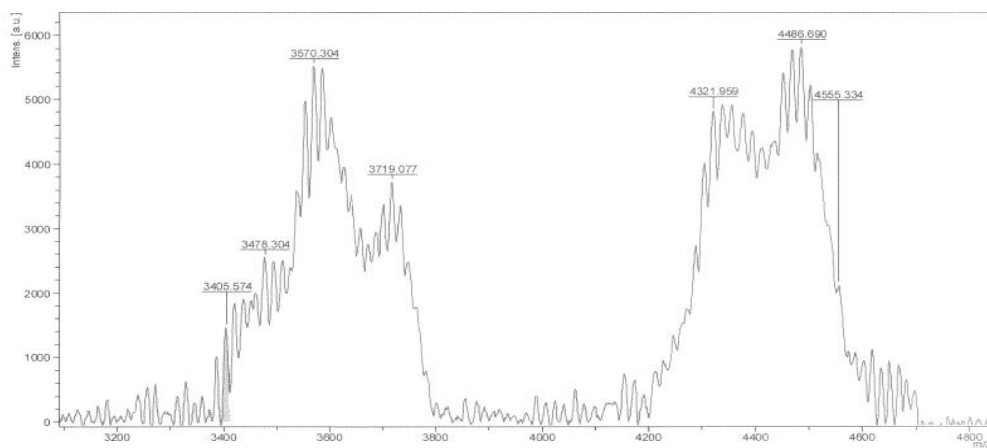

Figure S39. Maldi-tof of Compound 16.

### 1.11. Dendrimer 17

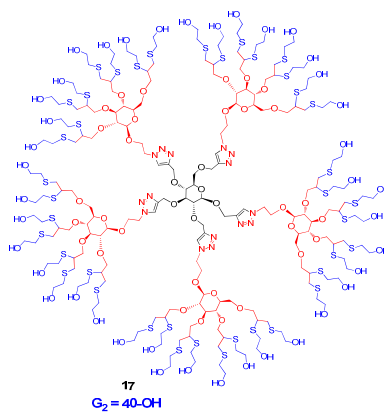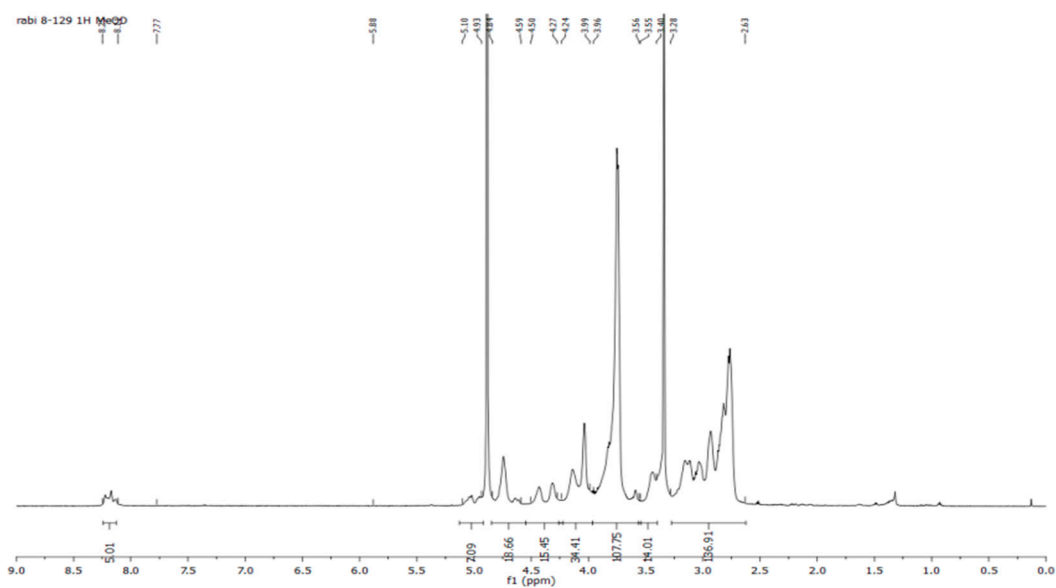

Figure S40. <sup>1</sup>H-NMR (D<sub>2</sub>O) spectrum of 17.

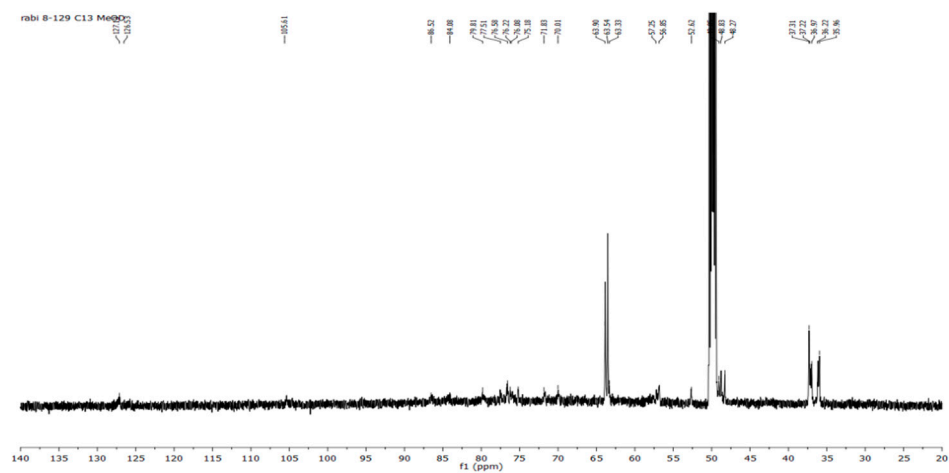Figure S41.  $^{13}\text{C}$ -NMR spectrum of 17.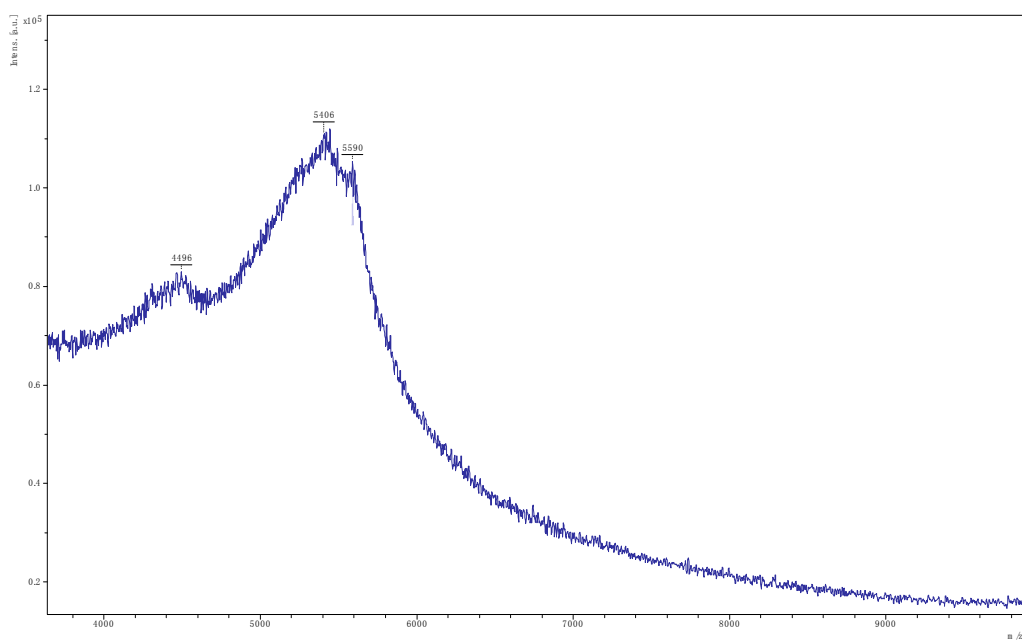

Figure S42. Maldi-tof of compound 17.

## 1.12. Dendrimer 18

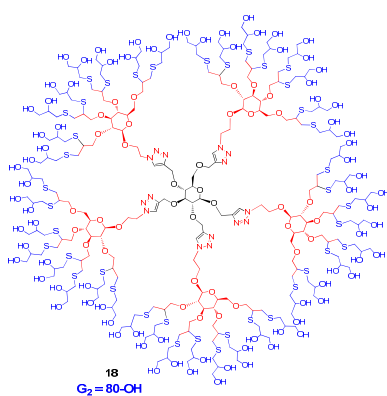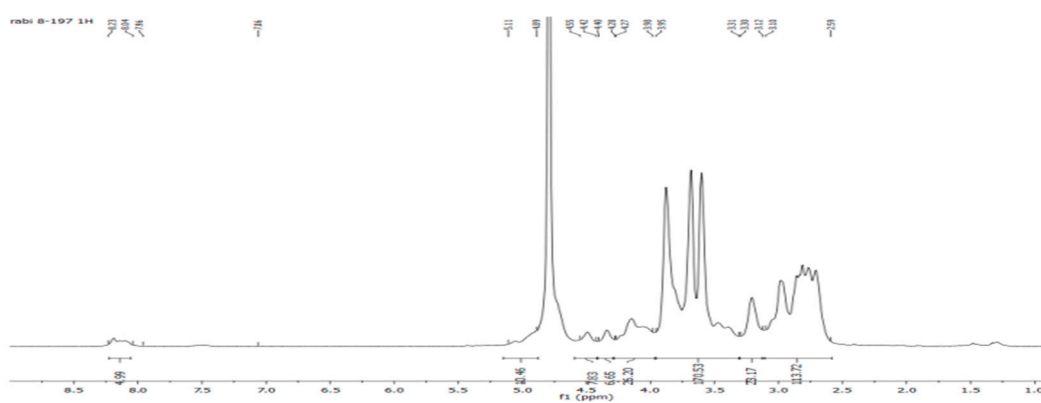Figure S43. <sup>1</sup>H-NMR (D<sub>2</sub>O) spectrum of 18.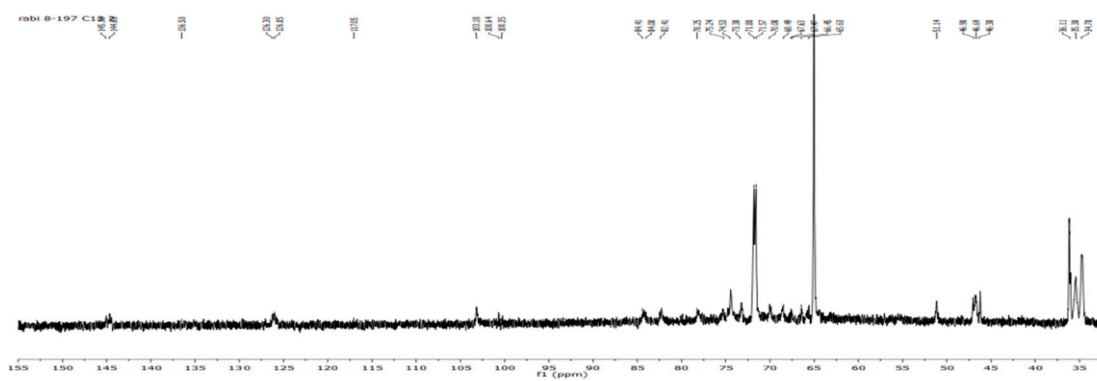Figure S44. <sup>13</sup>C-NMR spectrum of 18.

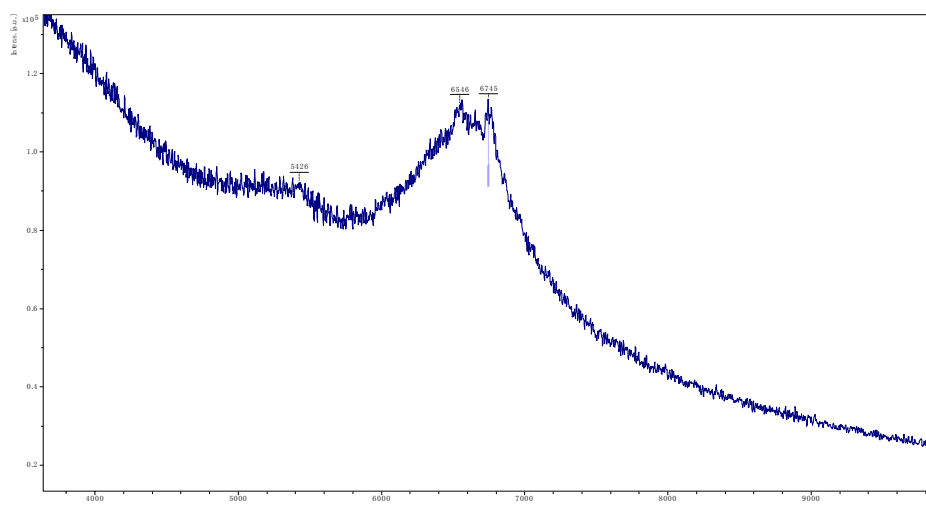

Figure S45. Maldi-tof of compound 18.

## 1.13. Dendrimer 19

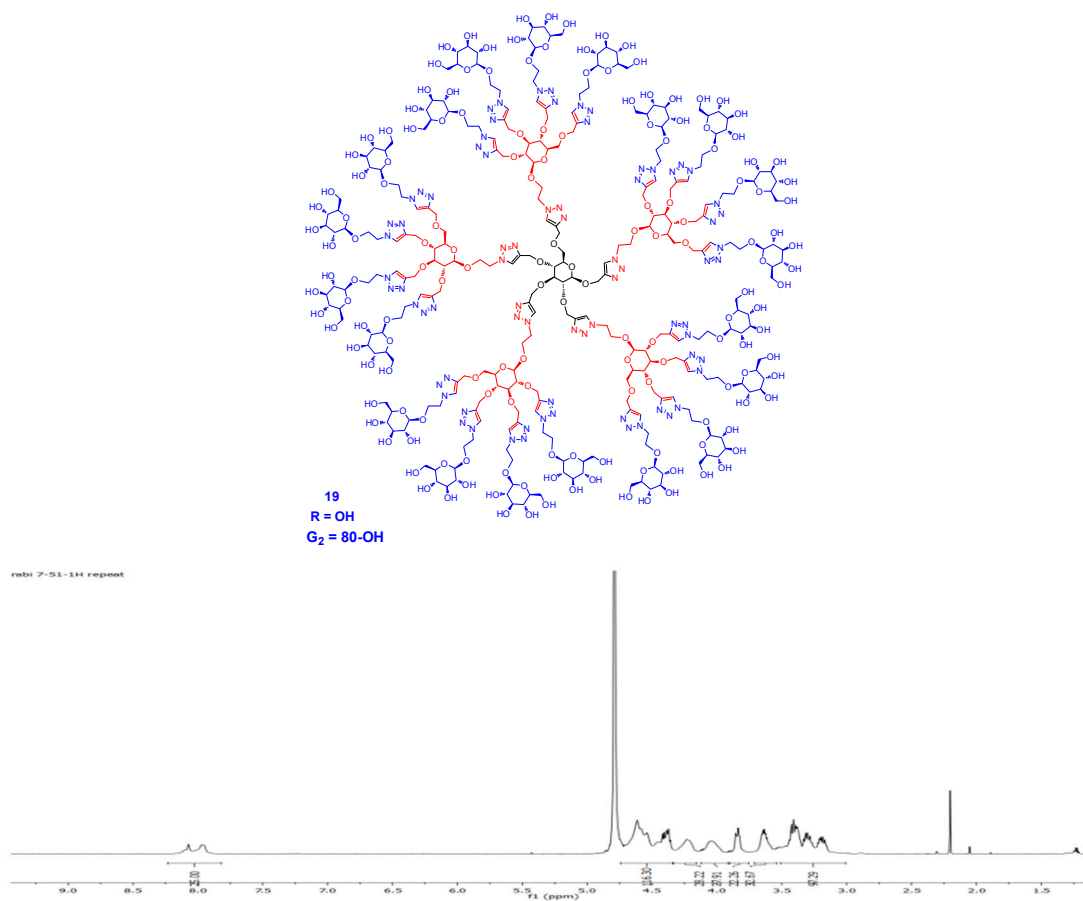Figure S46. <sup>1</sup>H-NMR (D<sub>2</sub>O) of 19.

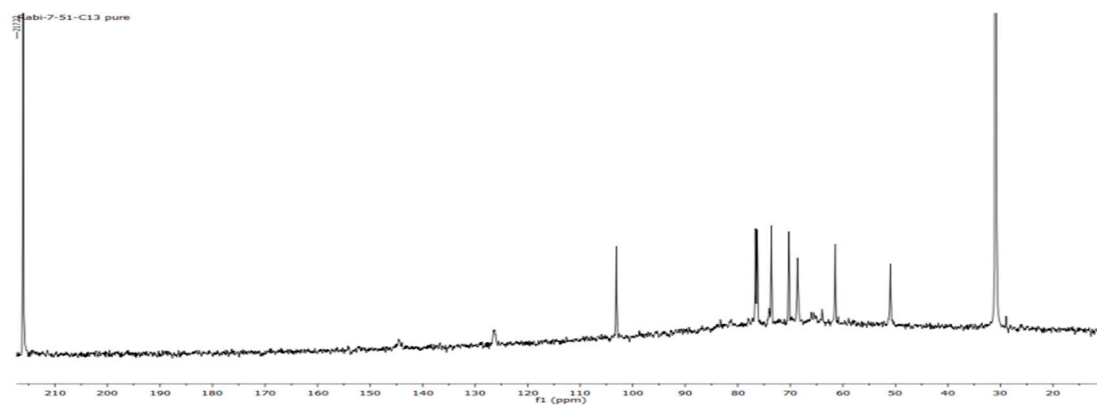

Figure S47.  $^{13}\text{C}$ -NMR of 19.

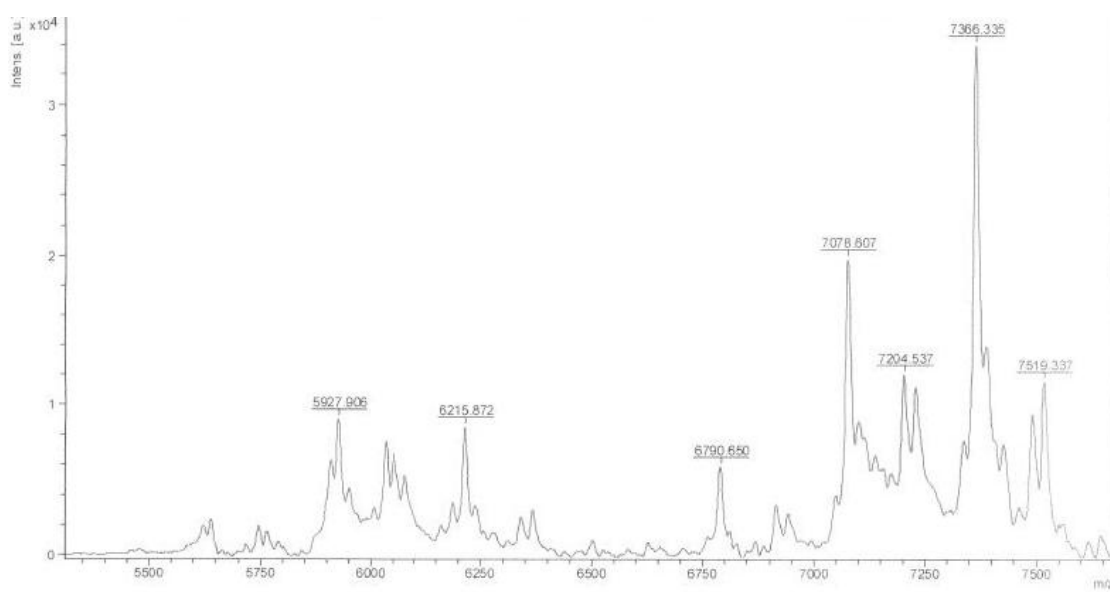

Figure S48. MALDI-TOF of Compound 19.

## 1.14. Dendrimer 20

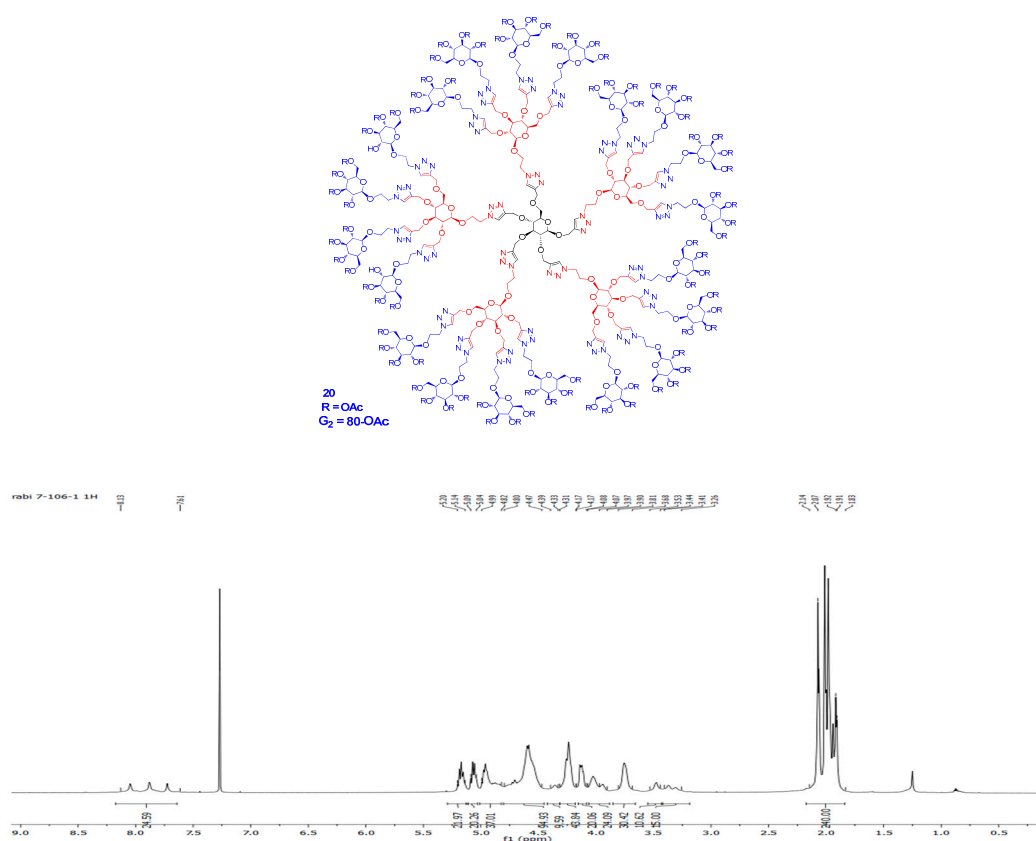Figure S49. <sup>1</sup>H-NMR (CDCl<sub>3</sub>) spectrum of 20.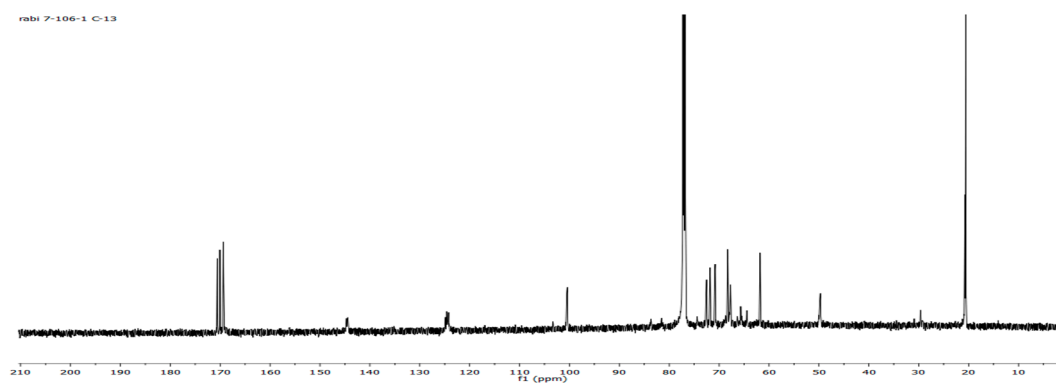Figure S50. <sup>13</sup>C-NMR spectrum of 20.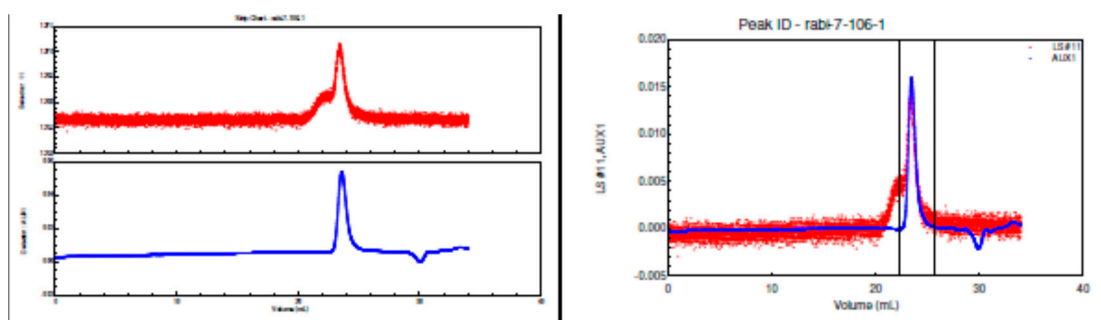

Figure S51. GPC of 20.

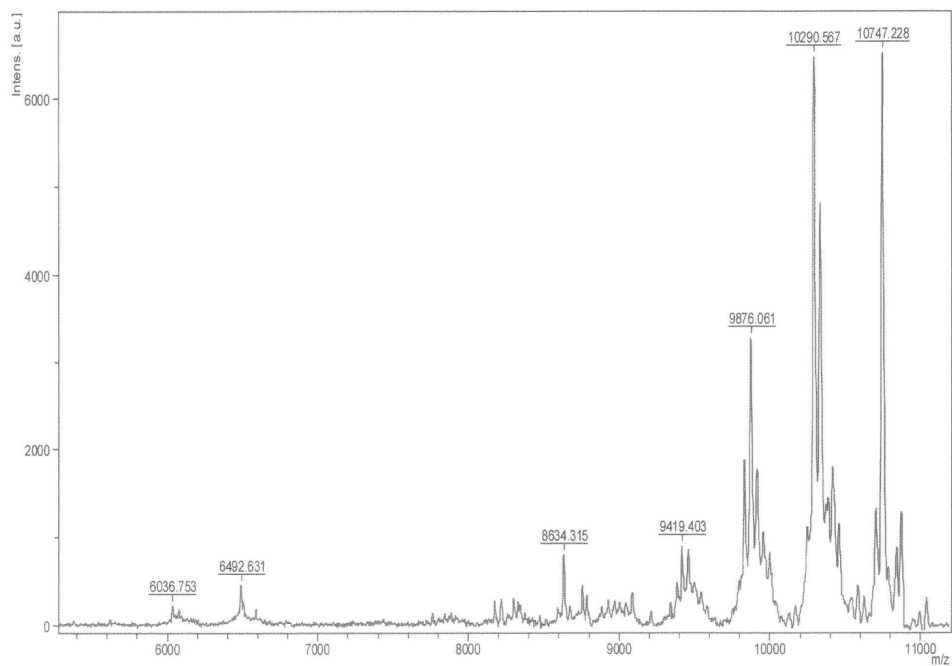

Figure S52. MALDI-TOF of Compound 20.

### 1.15. Dendrimer 21

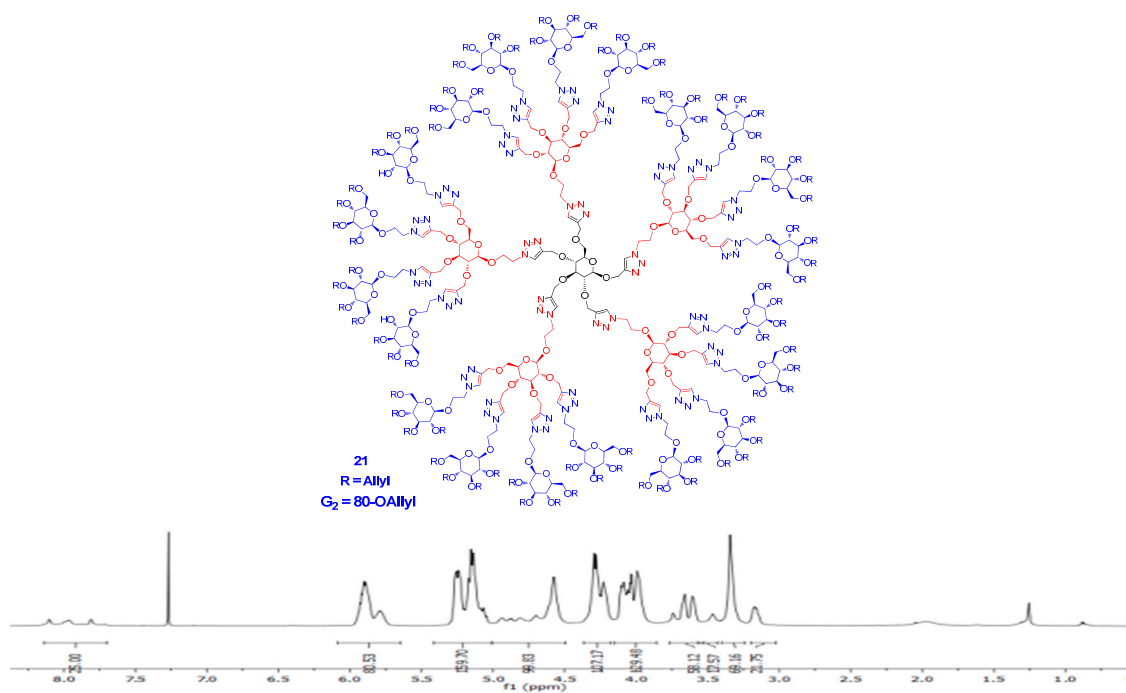

Figure S53. <sup>1</sup>H-NMR (CDCl<sub>3</sub>) spectrum of 21.

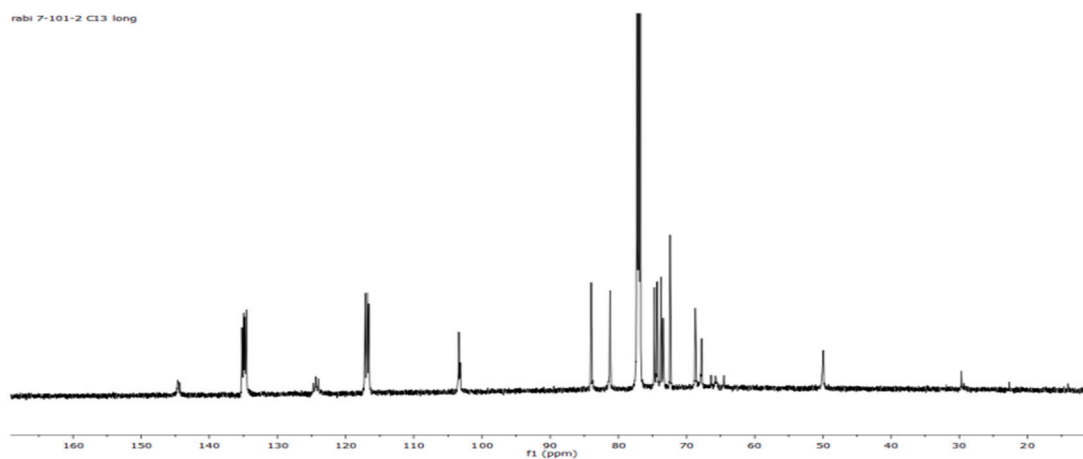Figure S54.  $^{13}\text{C}$ -NMR spectrum of 21.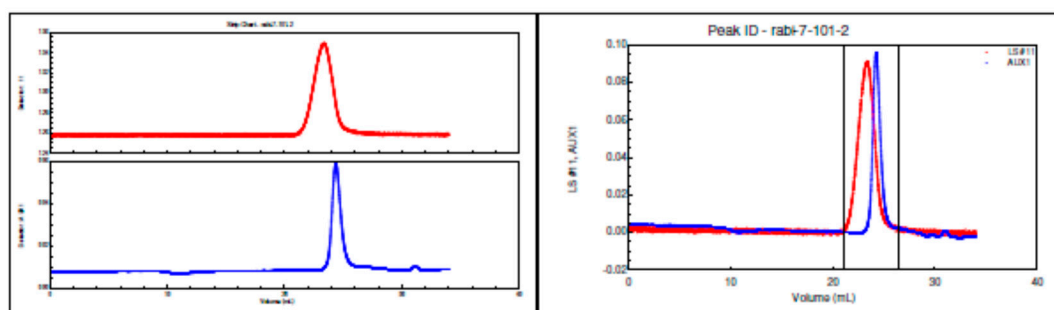

Figure S55. GPC of 21.

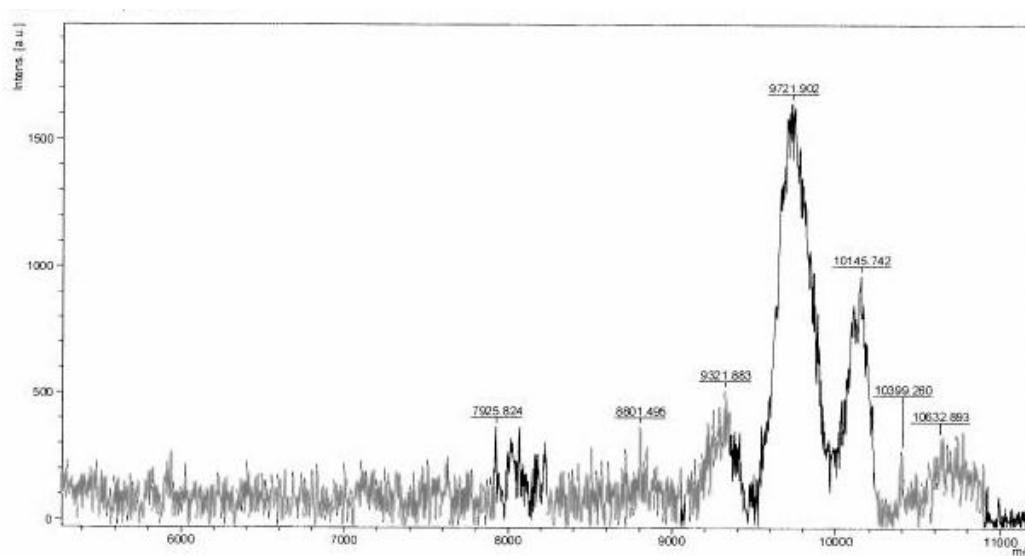

Figure S56. MALDI-TOF of Compound 21.



## 2. Computational Methods

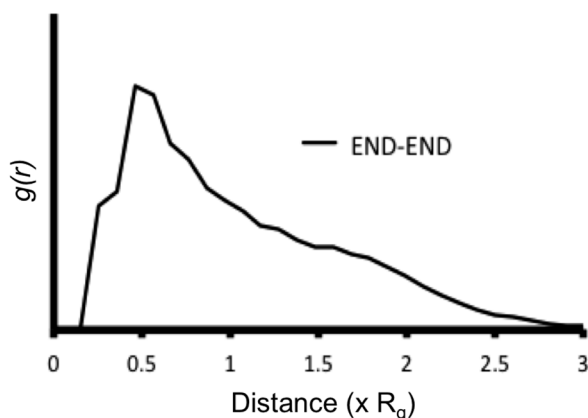

**Figure S57.** Radial distribution function ( $g(r)$ ) of the END groups as a function of the distance. The most probable distance between surface groups in equilibrated **16** is at *c.a.*  $0.5 \cdot R_g$  (i.e.,  $\approx 5 \text{ \AA}$ ).

**Table S1.** Main structural features of dendrimer **16** in solution at the equilibrium.

| $R_g$<br>( $\text{\AA}$ ) | END-END avg. Distance <sup>[a]</sup><br>( $\text{\AA}$ ) | SASA<br>( $\text{\AA}^2$ ) | $R_{SASA}$ <sup>[b]</sup><br>( $\text{\AA}$ ) | $V_{SASA}$ <sup>[c]</sup><br>( $\text{\AA}^3$ ) | $V_g$ <sup>[c]</sup><br>( $\text{\AA}^3$ ) | $V_{void}$ <sup>[d]</sup><br>( $\text{\AA}^3$ ) | Porosity <sup>[e]</sup> |
|---------------------------|----------------------------------------------------------|----------------------------|-----------------------------------------------|-------------------------------------------------|--------------------------------------------|-------------------------------------------------|-------------------------|
| 9.8                       | 5                                                        | 3332                       | 16.3                                          | 18124                                           | 4017                                       | 14107                                           | 0.78                    |

<sup>[a]</sup> Calculated from the position of the END-END  $g(r)$  peak (Figure S57). <sup>[b]</sup> Calculated from SASA, being  $SASA=4\pi R_{SASA}^2$ . <sup>[c]</sup> Calculated as the volume of the spheres having radius  $R_g$  ("full" volume) or  $R_{SASA}$  ("total" volume). <sup>[d]</sup>  $V_{void} = V_{SASA} - V_g$ . <sup>[e]</sup> Dendrimer's porosity is calculated as the ratio between void volume ( $V_{void}$ ) over the total one ( $V_{SASA}$ ).

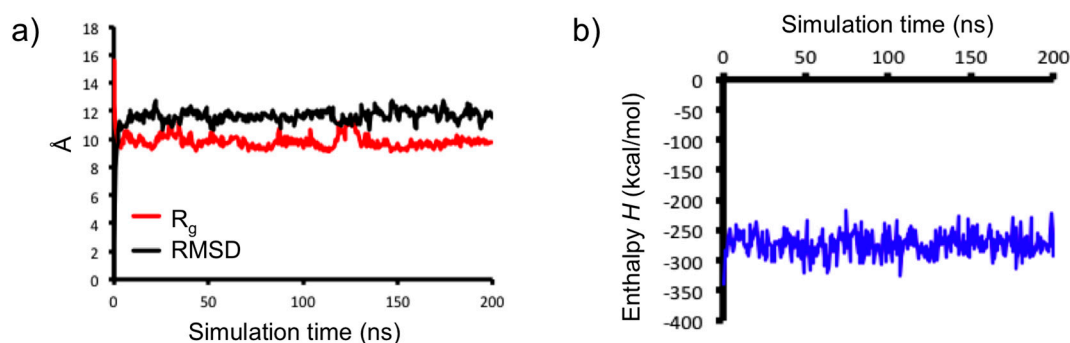

**Figure S58.** Equilibration of dendrimer **16** during the MD simulation. (a) Root mean square displacement (RMSD: black) and radius of gyration ( $R_g$ : red) data for **16** as a function of simulation time; (b) Enthalpy  $H$  of **16** calculated as the sum of solute-solute and solute-solvent interactions.
